# Supplementary material for: Ergosterols from the Culture Broth of Marine Streptomyces anandii H41-59
Source: MDPI journal article supplement (doi:10.3390/md14050084), 2016-05-04
Supplement: s1 [file s1]

## Supplementary Materials: Ergosterols from Culture Broth of a Marine Derived *Streptomyces* sp. H41-59

Yang-Mei Zhang, Hong-Yu Li, Chen Hu, Hui-Fan Sheng, Ying Zhang, Bi-Run Lin and Guang-Xiong Zhou

### Compound 1

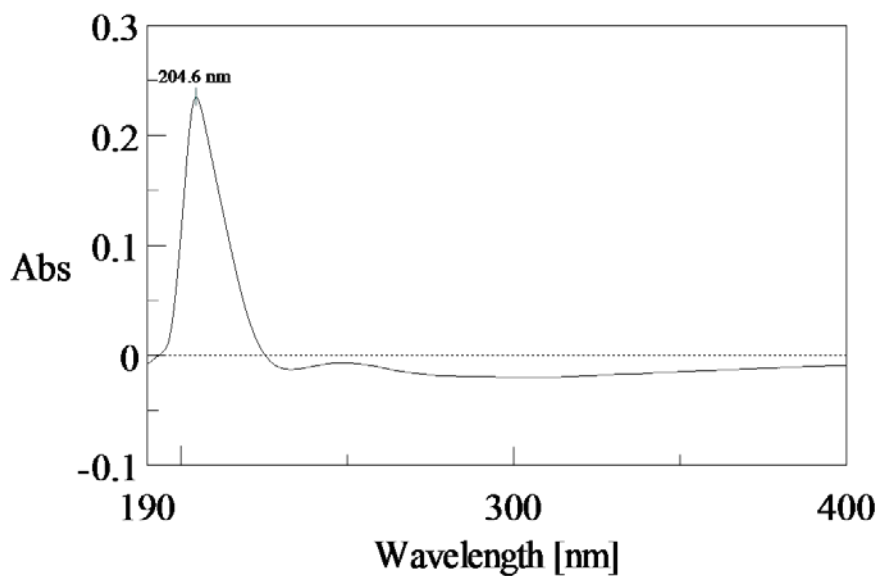

Figure S1. UV spectrum of compound 1 in MeOH.

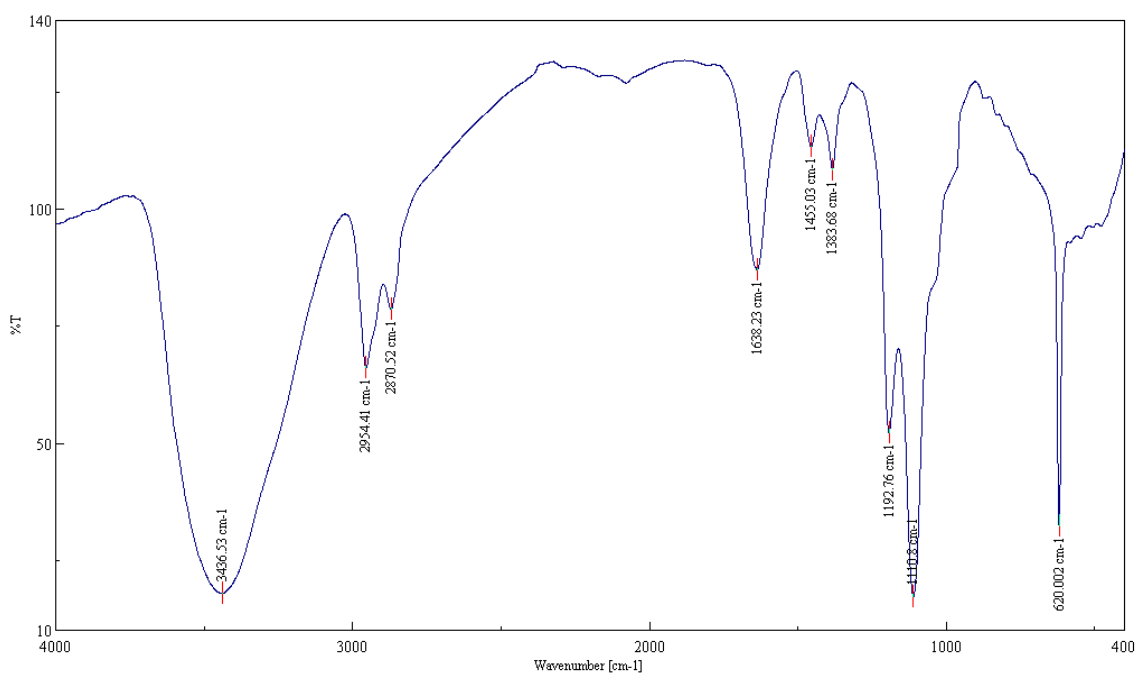

Figure S2. IR spectrum of compound 1.

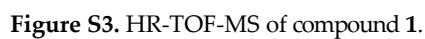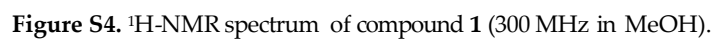

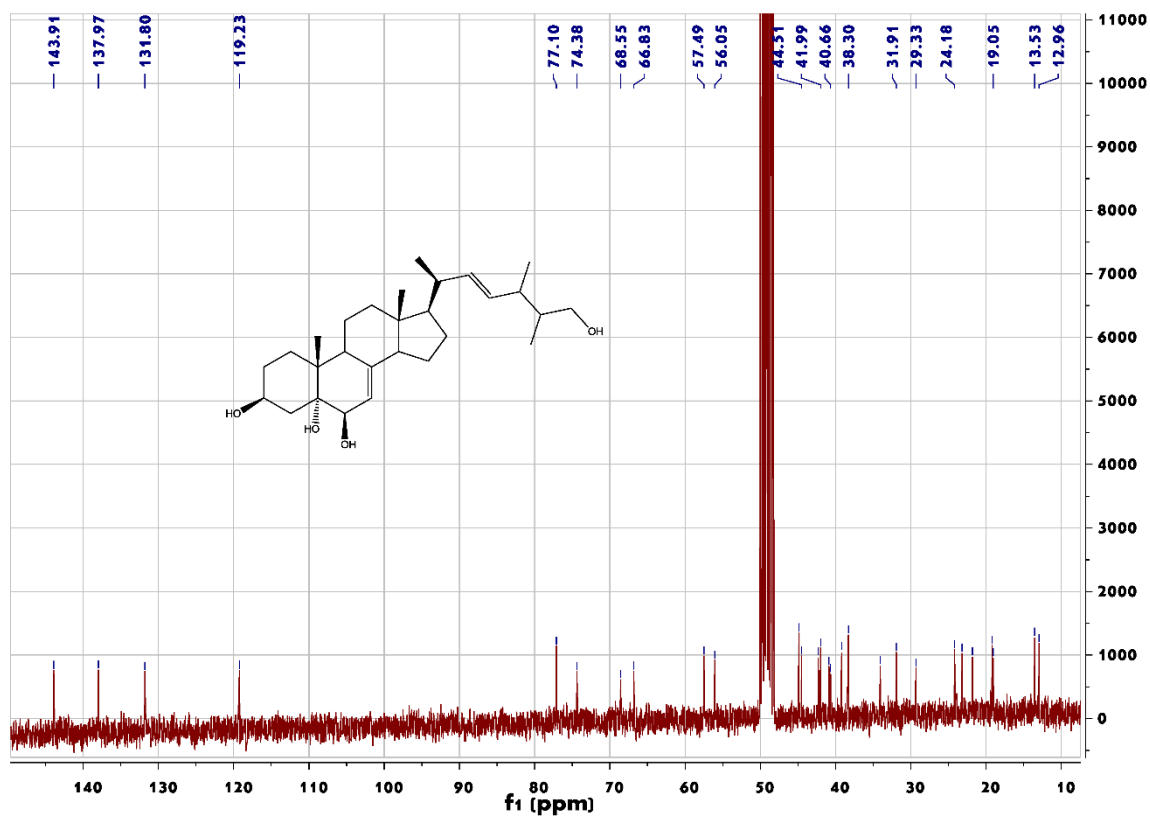Figure S5. <sup>13</sup>C-NMR spectrum of compound 1 (75 MHz in MeOH).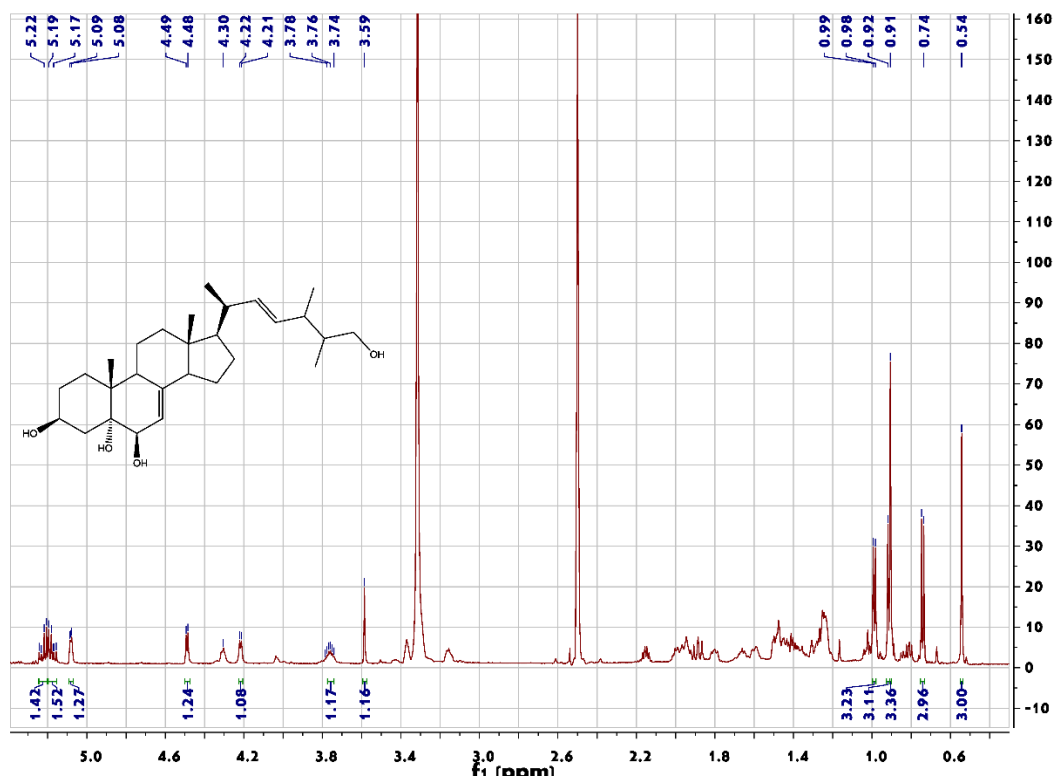Figure S6. <sup>1</sup>H-NMR spectrum of compound 1 (300 MHz in DMSO-*d*<sub>6</sub>).

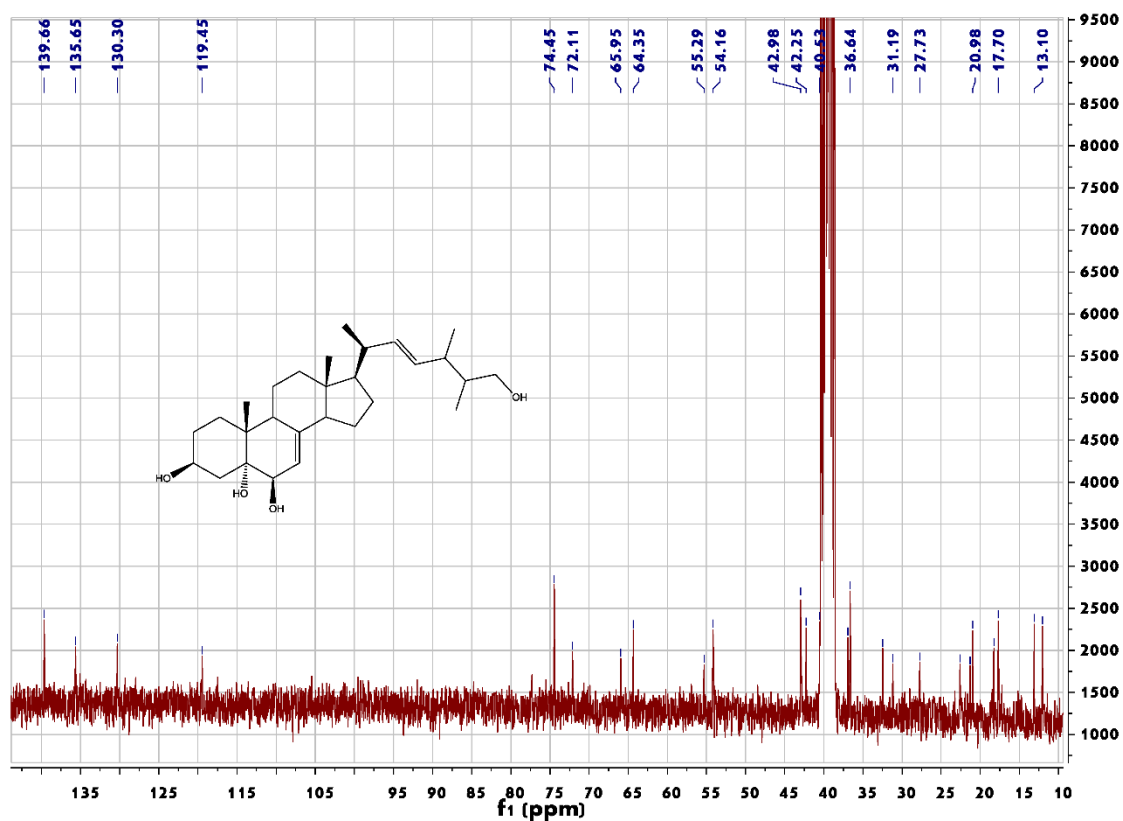Figure S7. <sup>13</sup>C-NMR spectrum of compound 1 (75 MHz in DMSO-*d*<sub>6</sub>).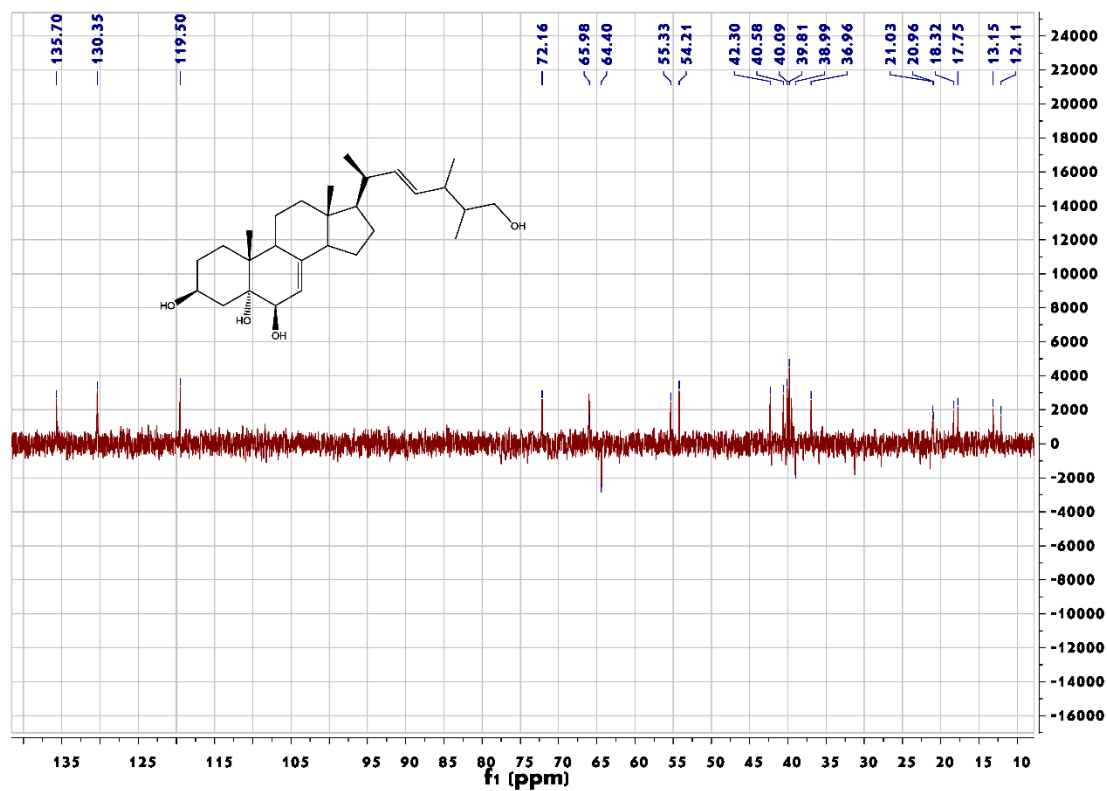Figure S8. DEPT spectrum of compound 1 (75 MHz in DMSO-*d*<sub>6</sub>).

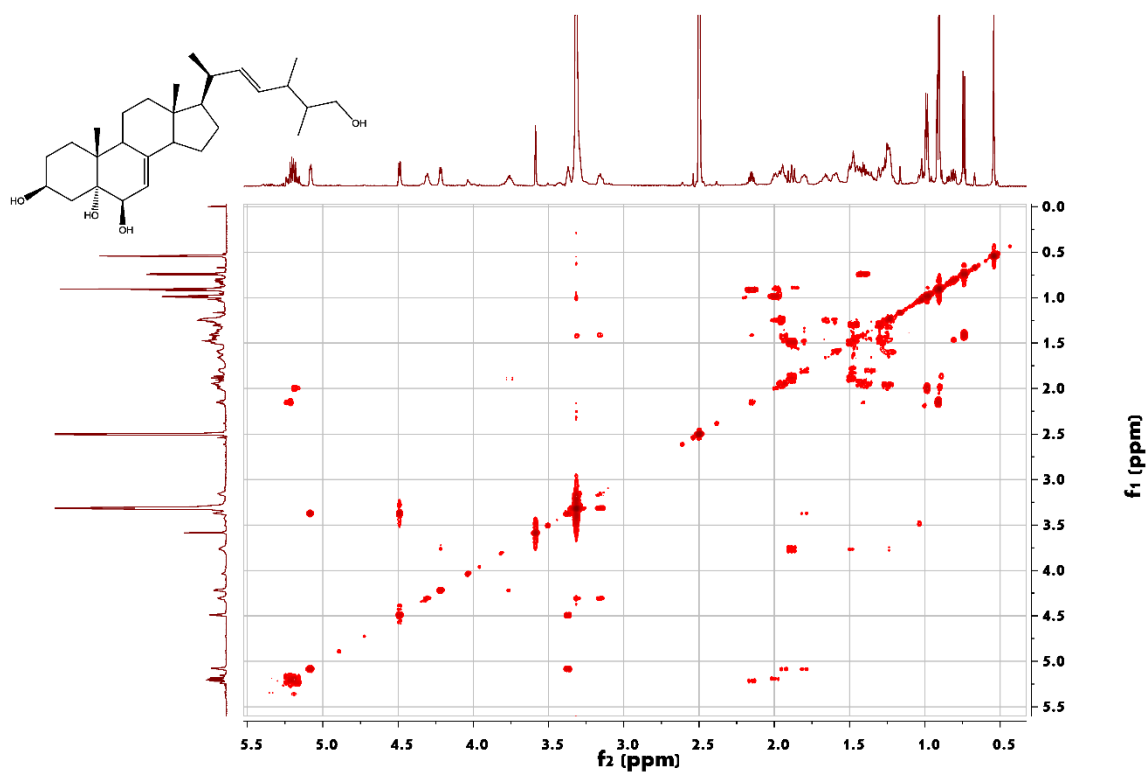Figure S9. COSY spectrum of compound 1 (600 MHz in  $\text{DMSO-}d_6$ ).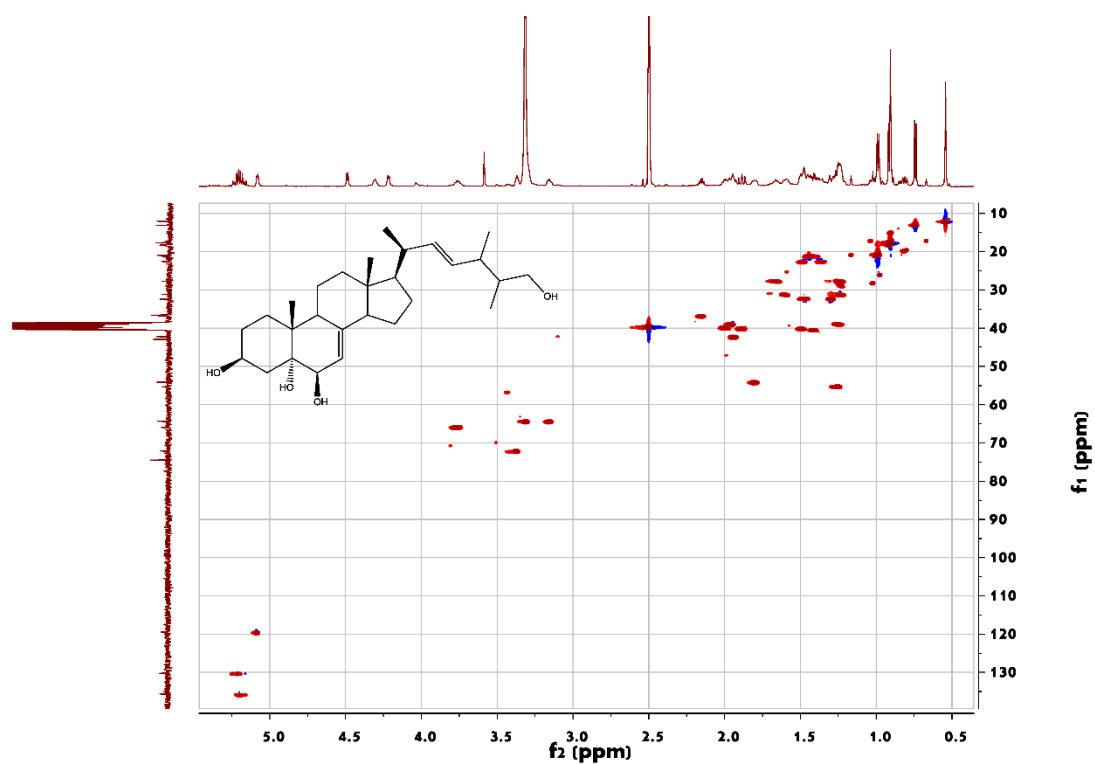Figure S10. HMBC spectrum of compound 1 (600 MHz in  $\text{DMSO-}d_6$ ).

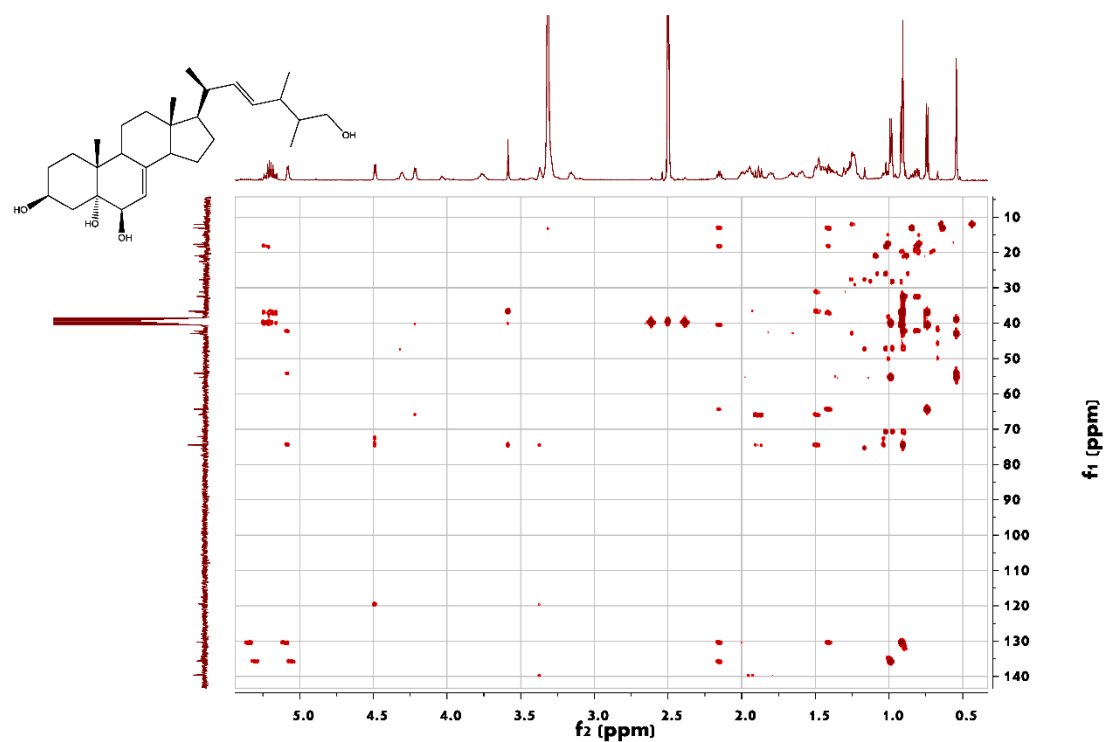

Figure S11. HMBC spectrum of compound 1 (600 MHz in DMSO-*d*<sub>6</sub>).

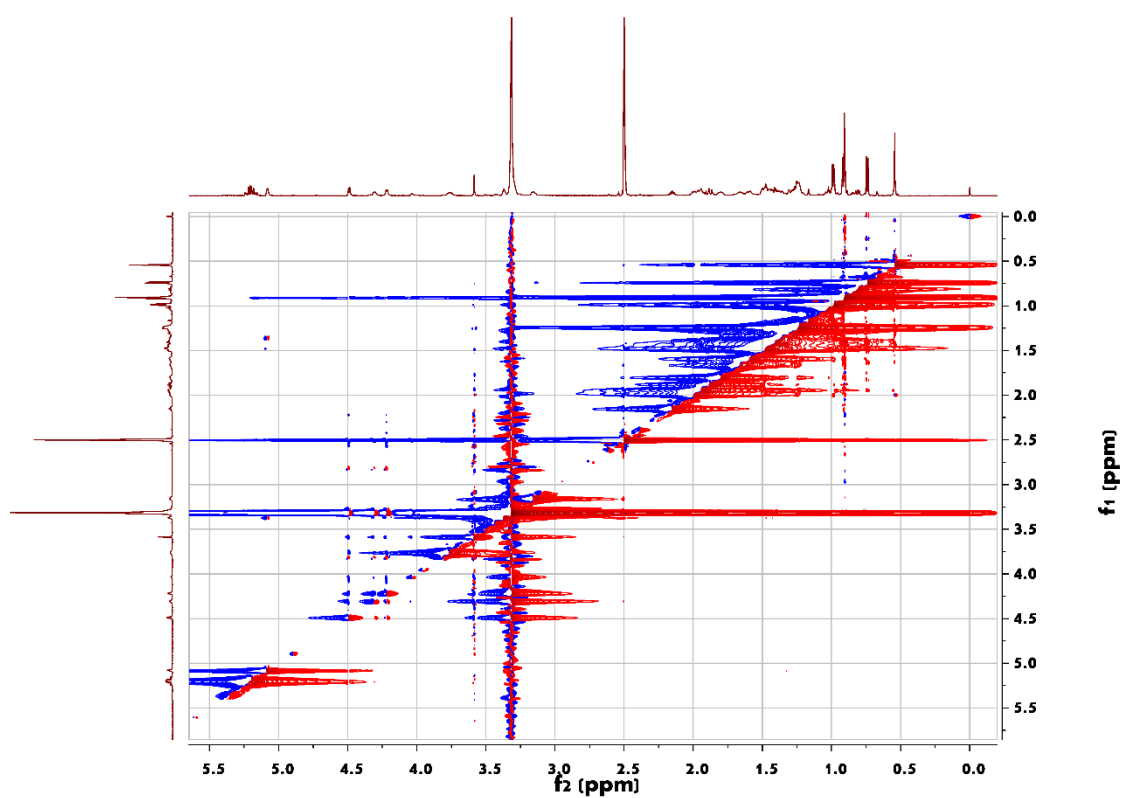

Figure S12. NOESY spectrum of compound 1 (600 MHz in DMSO-*d*<sub>6</sub>).

**Compound 2**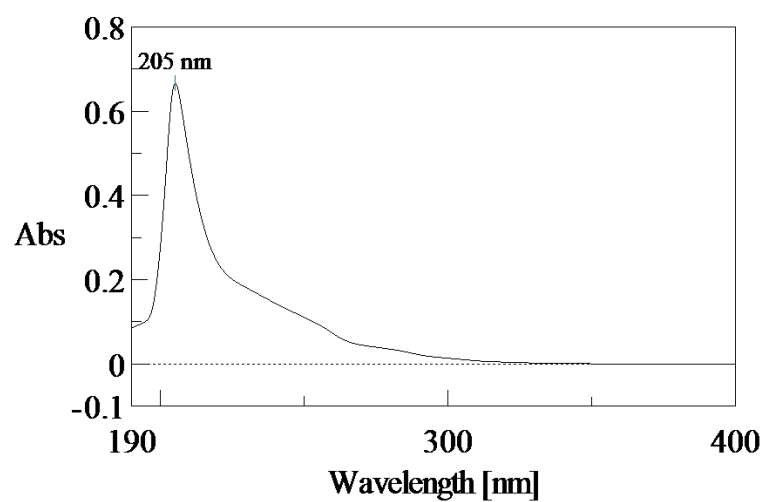**Figure S13.** UV spectrum of compound 2 in MeOH.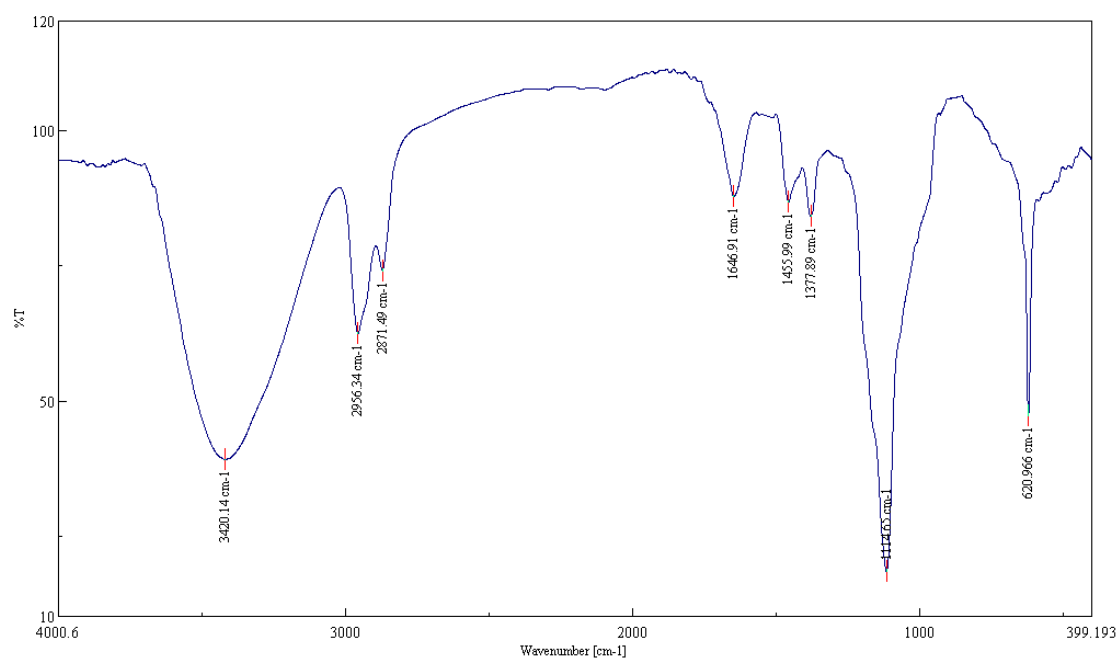**Figure S14.** IR spectrum of compound 2.

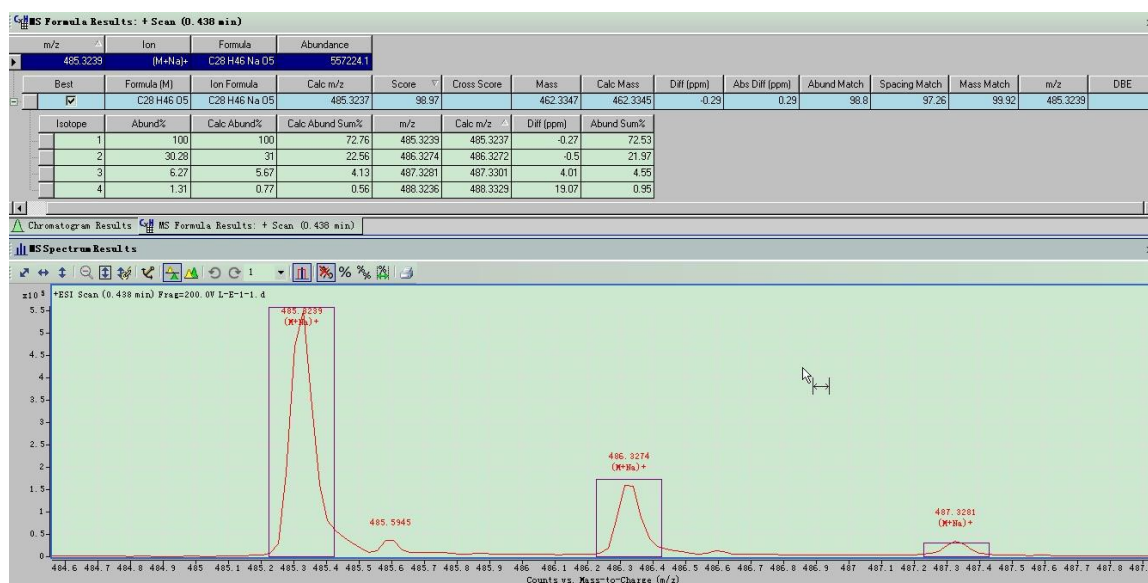

Figure S15. HR-MS of compound 2.

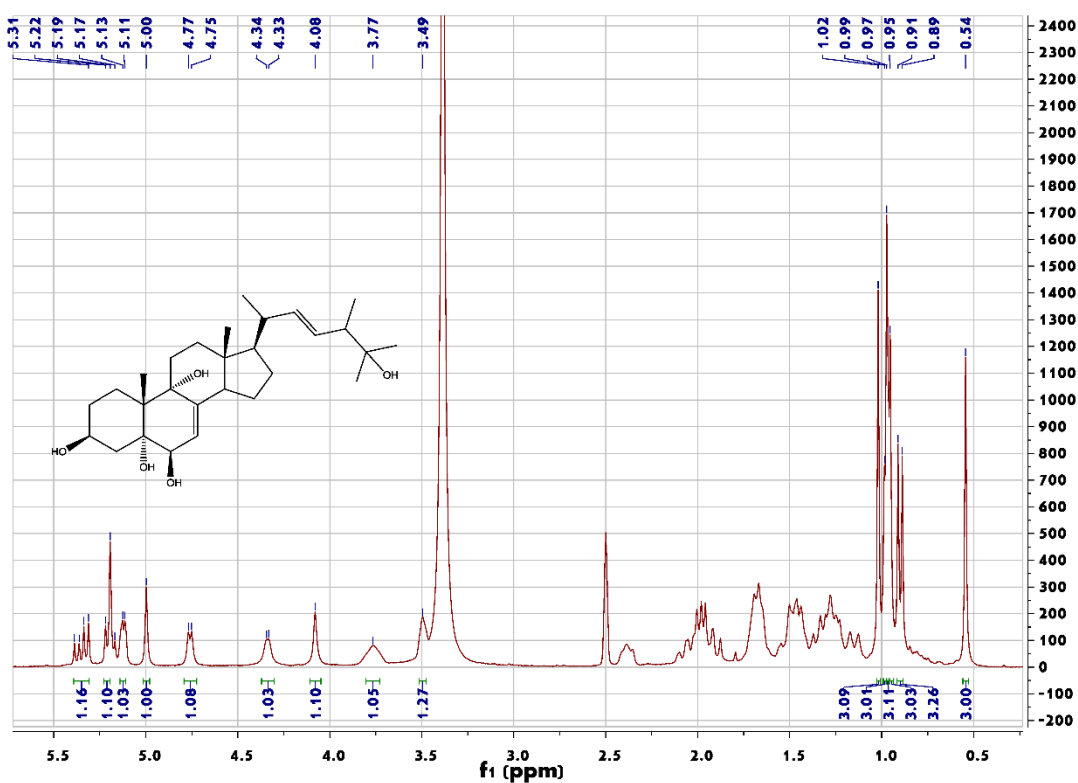Figure S16. <sup>1</sup>H-NMR spectrum of compound 2 (300 MHz in DMSO-*d*<sub>6</sub>).



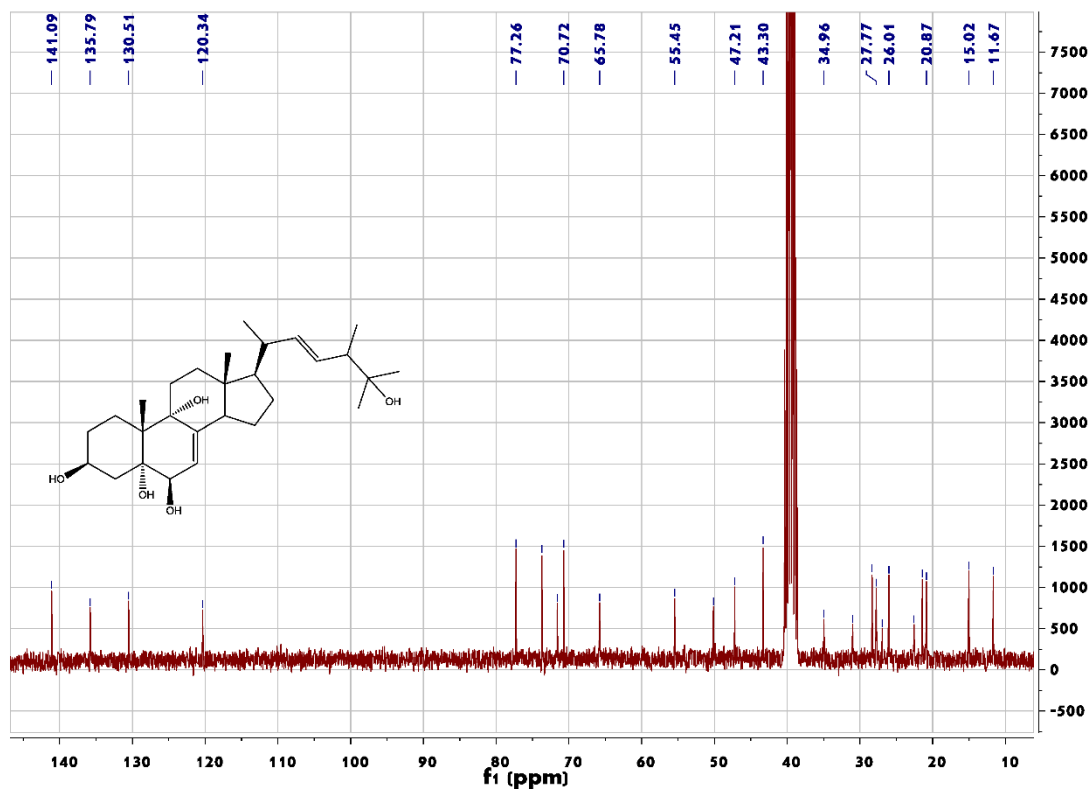Figure S17.  $^{13}\text{C}$ -NMR spectrum of compound 2 (75 MHz in  $\text{DMSO-}d_6$ ).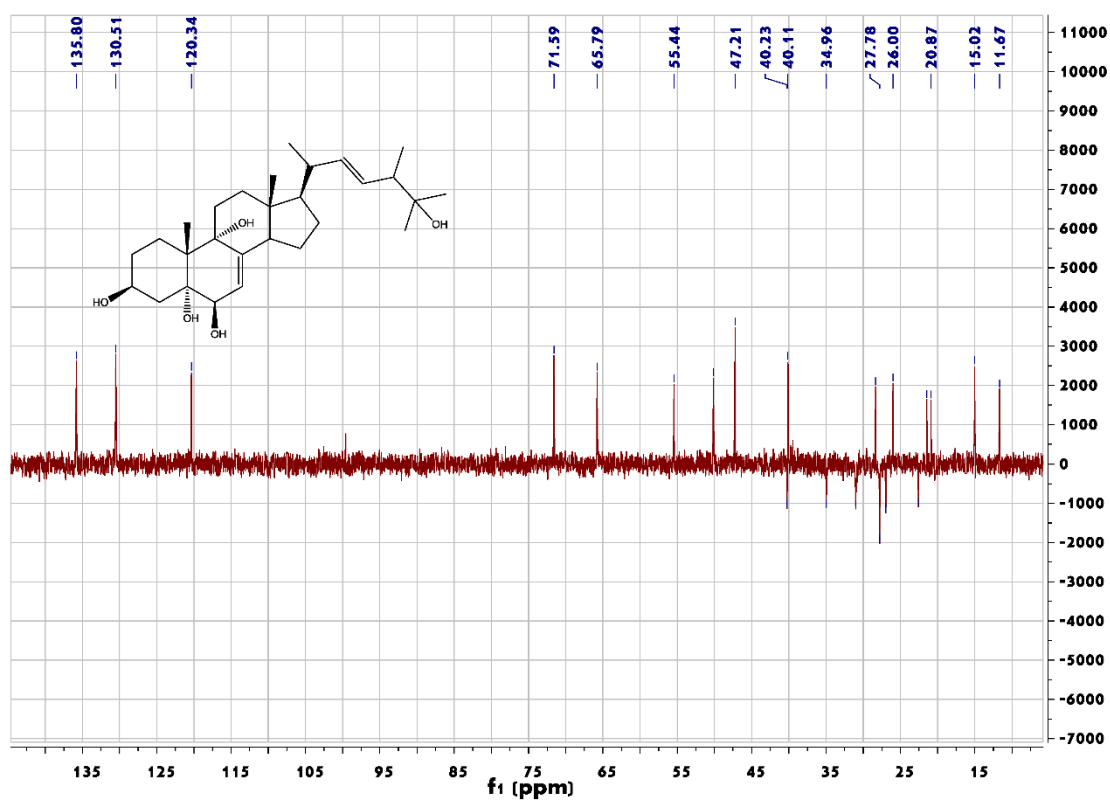Figure S18. DEPT spectrum of compound 2 (75 MHz in  $\text{DMSO-}d_6$ ).

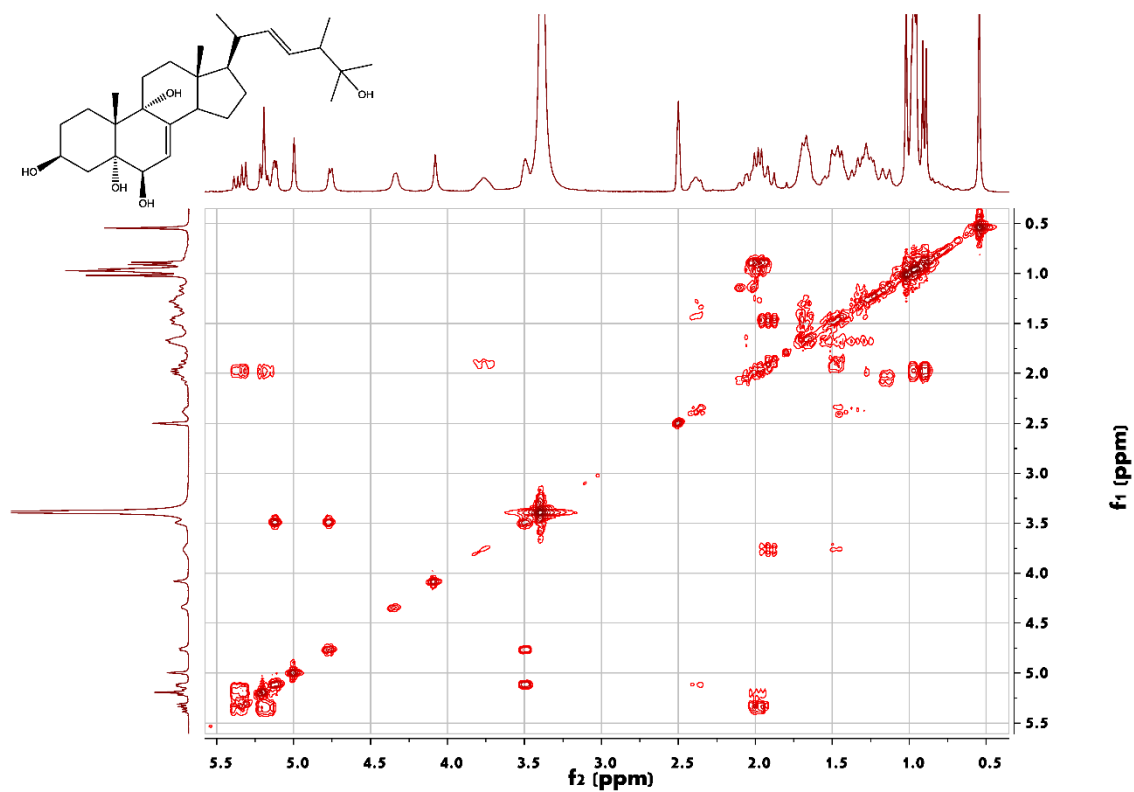

Figure S19. COSY spectrum of compound 2 (300 MHz in DMSO-*d*<sub>6</sub>).

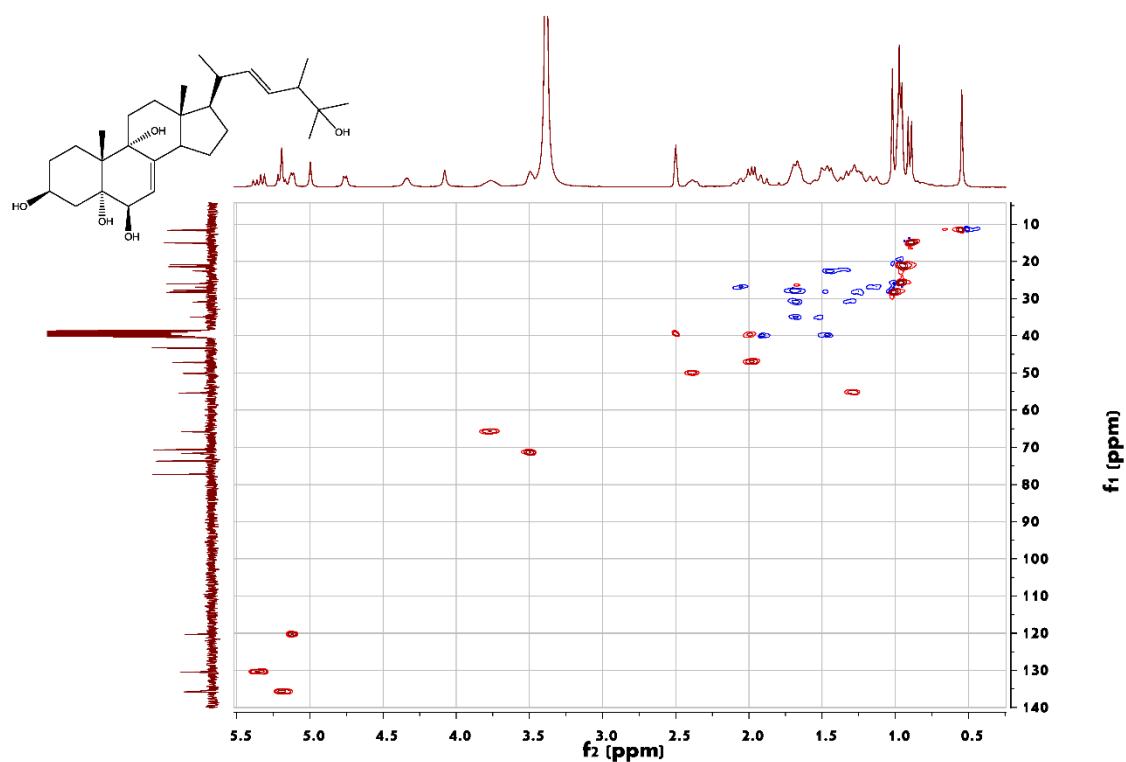

Figure S20. HMQC spectrum of compound 2 (300 MHz in DMSO-*d*<sub>6</sub>).

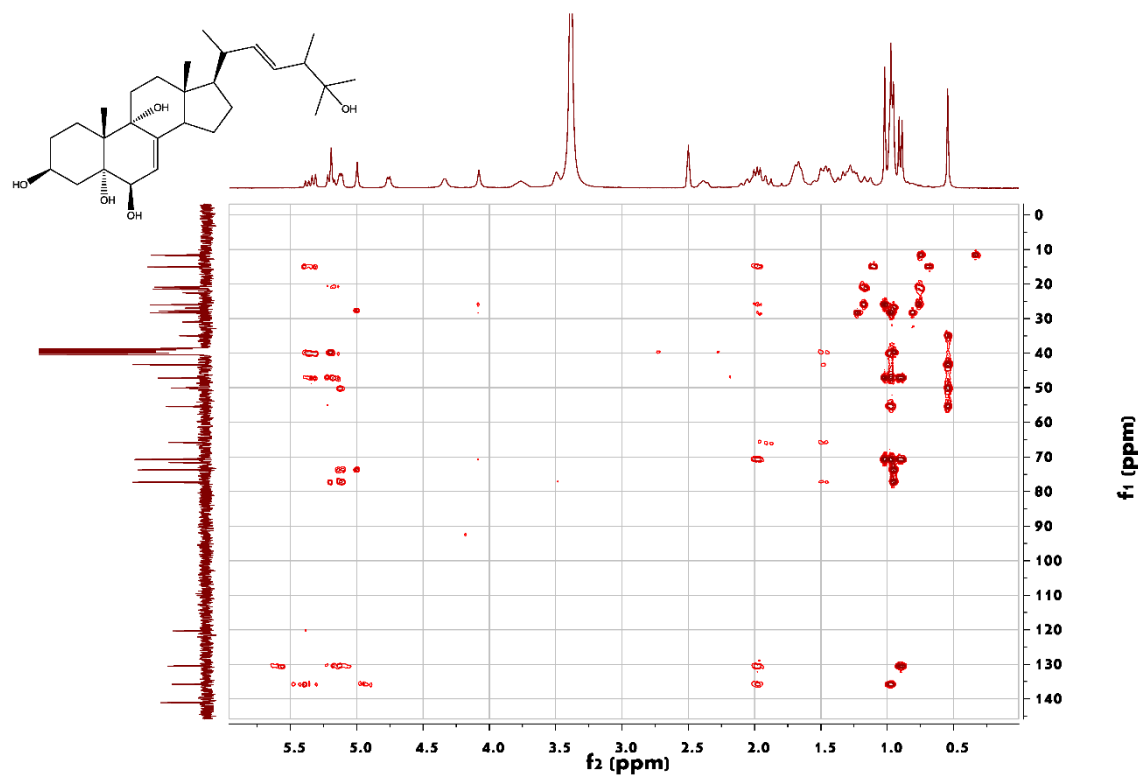

Figure S21. HMBC spectrum of compound 2 (300 MHz in DMSO-*d*<sub>6</sub>).

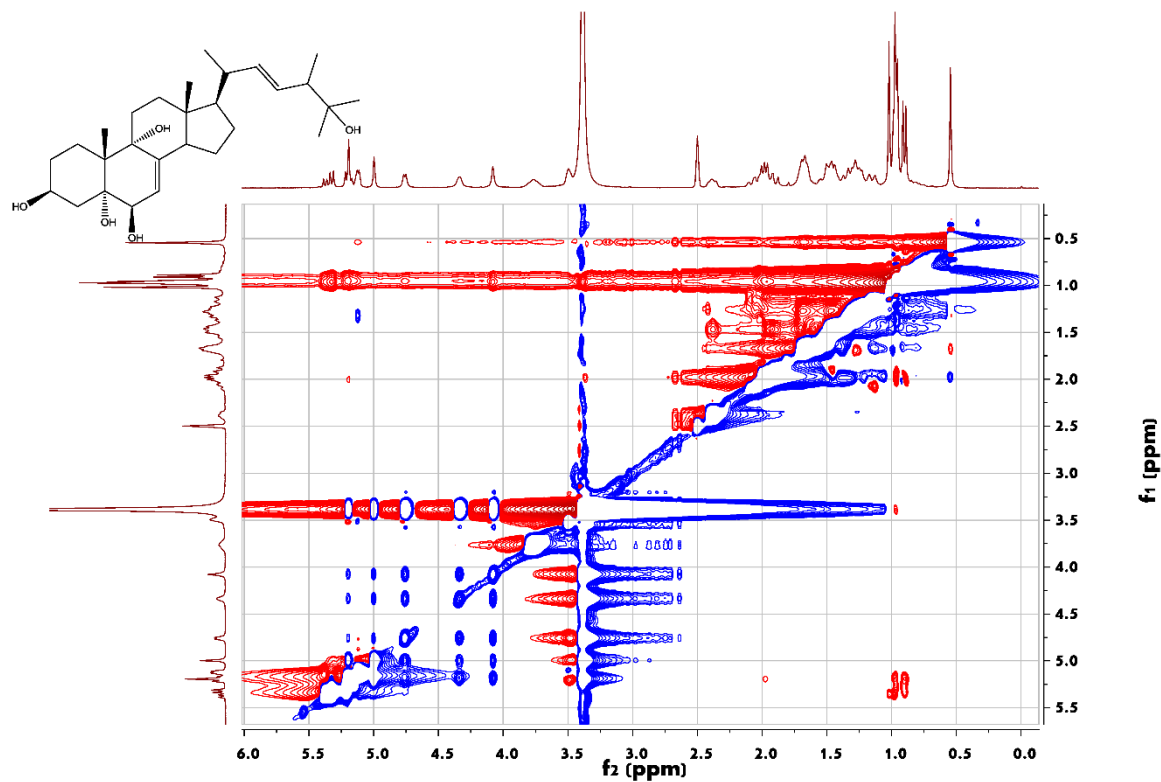

Figure S22. NOESY spectrum of compound 2 (300 MHz in DMSO-*d*<sub>6</sub>).

**Compound 3**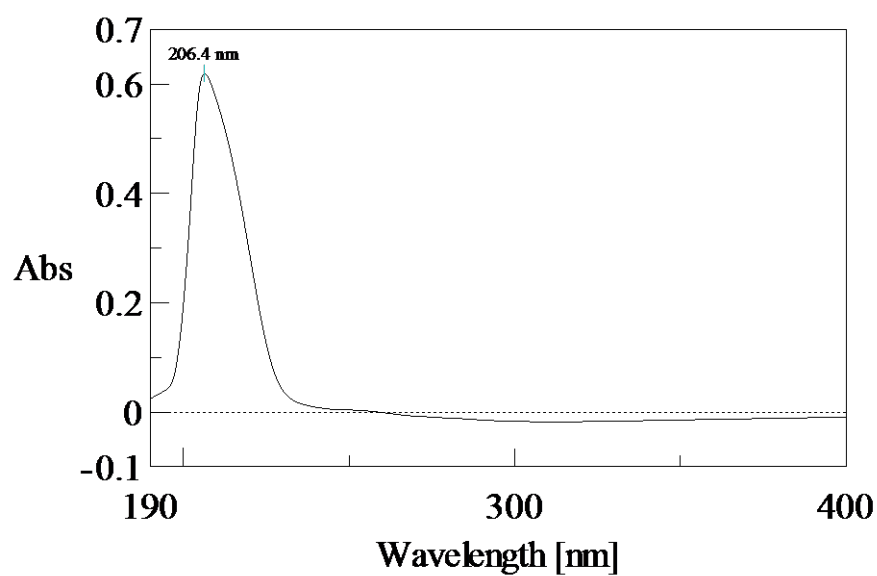

Figure S23. UV spectrum of compound 3 in MeOH.

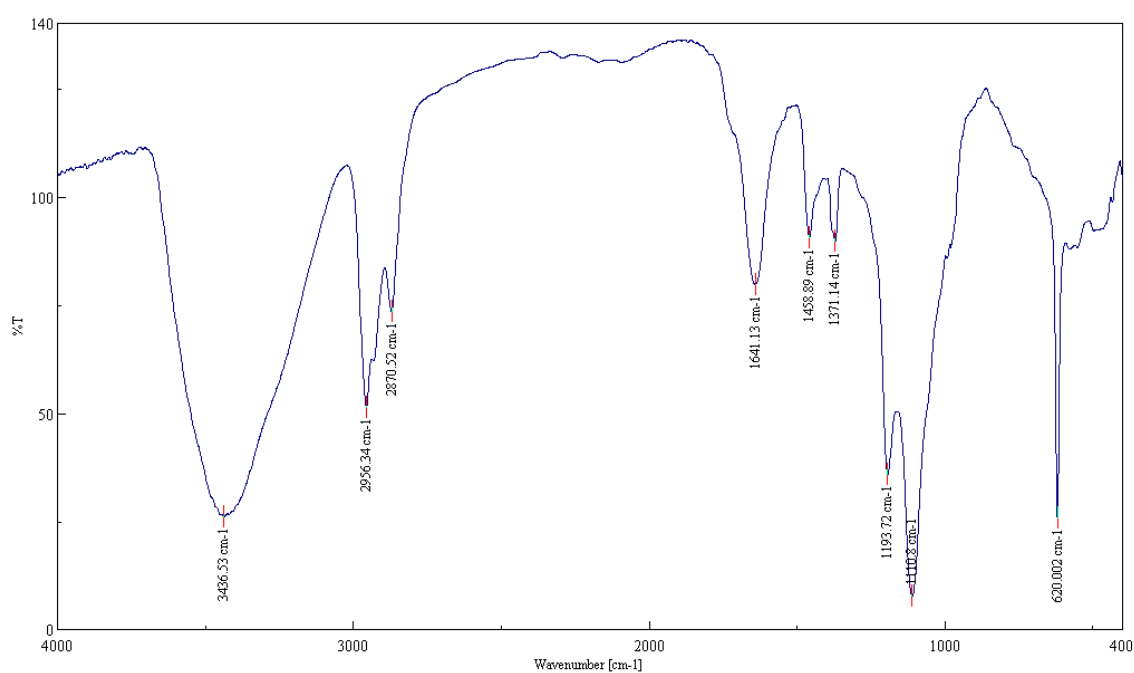

Figure S24. IR spectrum of compound 3.

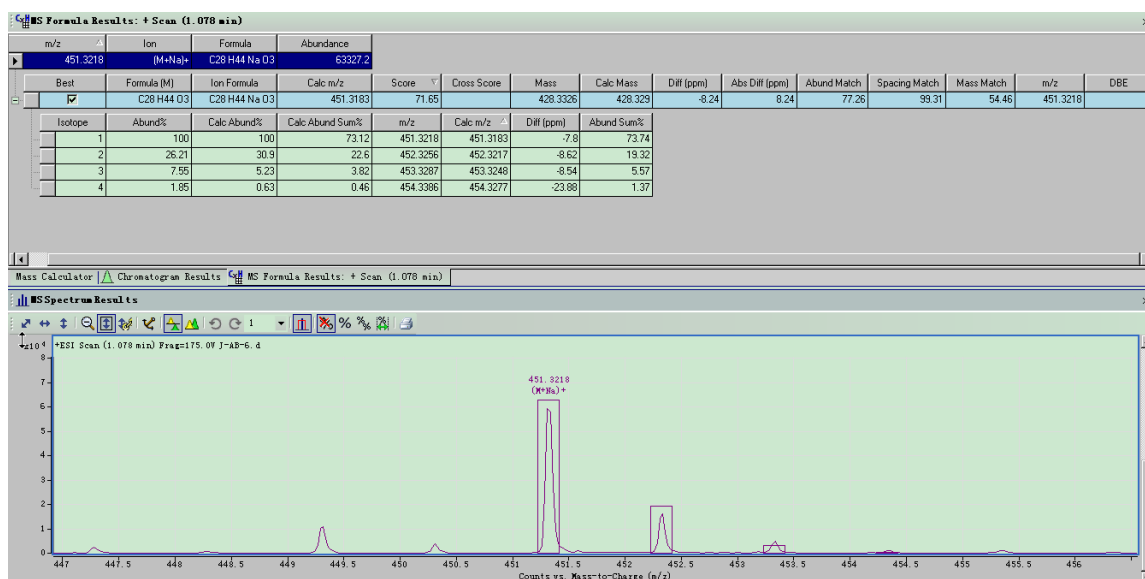

Figure S25. HR-MS of compound 3.

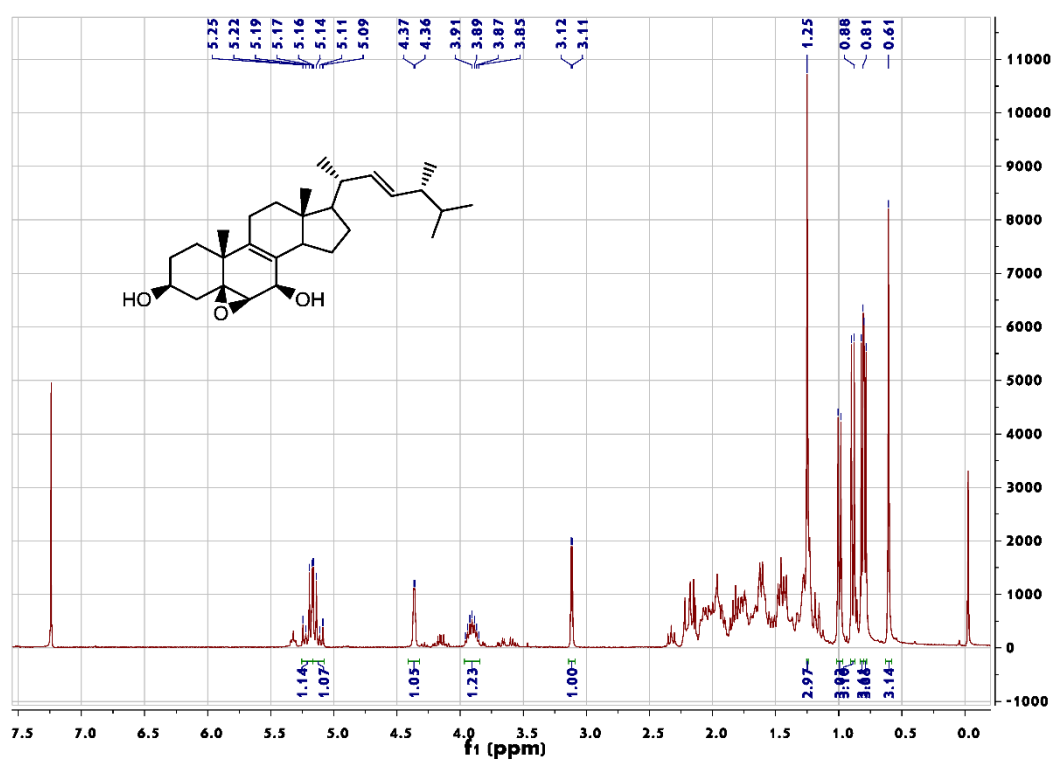Figure S26. <sup>1</sup>H-NMR spectrum of compound 3 (300 MHz in CDCl<sub>3</sub>).

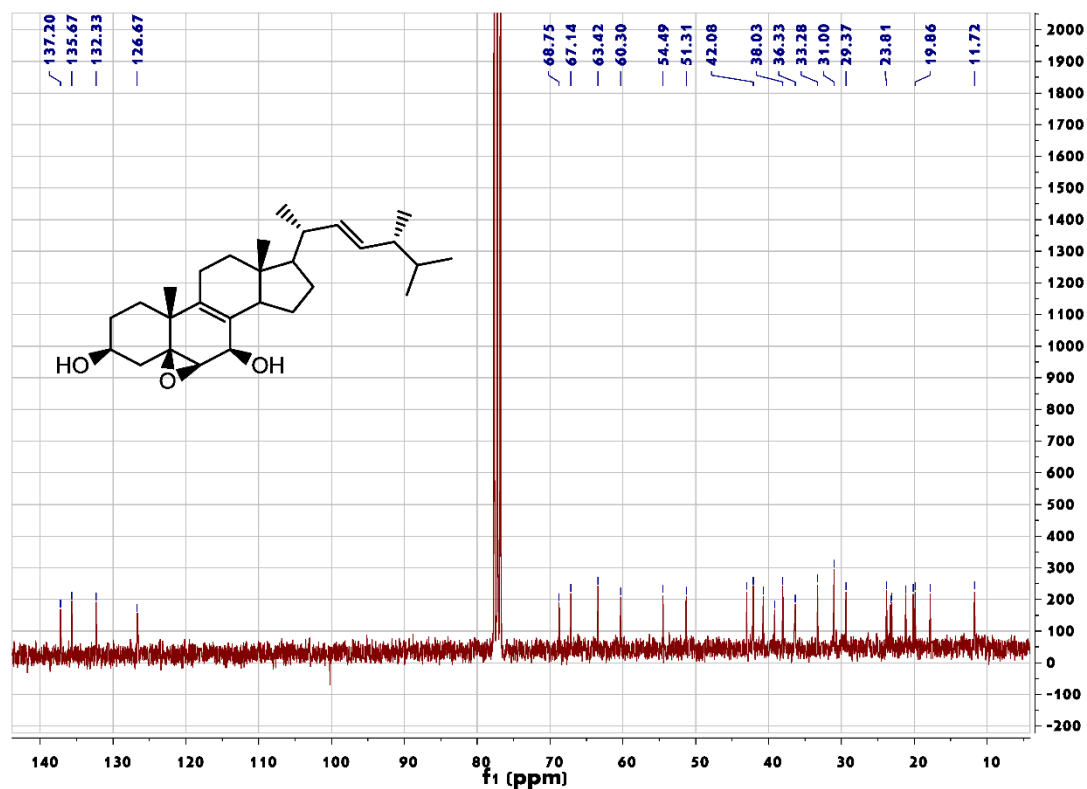Figure S27. <sup>13</sup>C-NMR spectrum of compound 3 (75 MHz in CDCl<sub>3</sub>).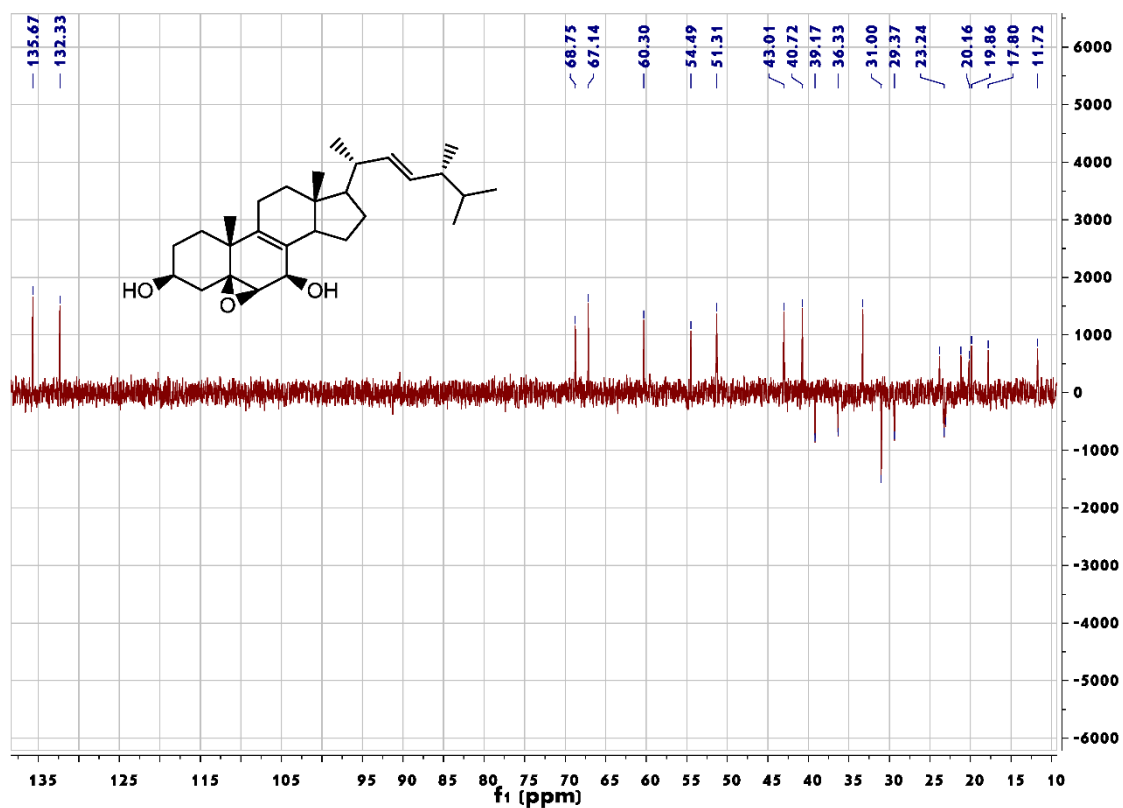Figure S28. DEPT spectrum of compound 3 (75 MHz in CDCl<sub>3</sub>).

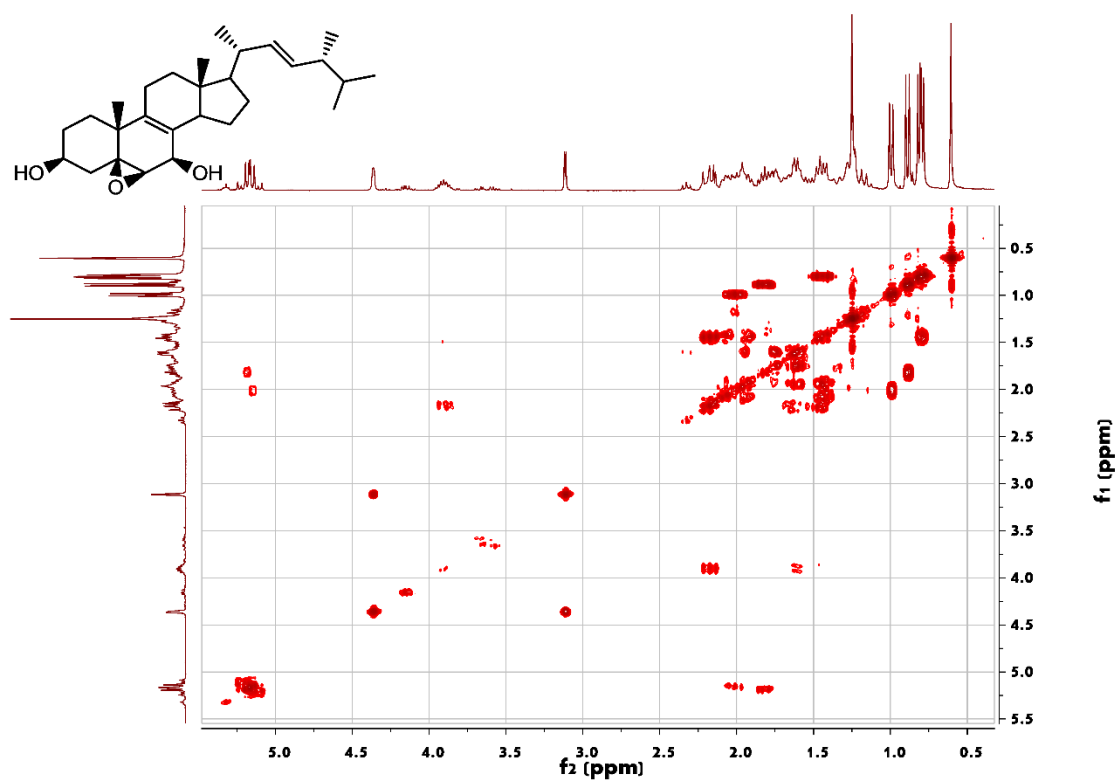

Figure S29. COSY spectrum of compound 3 (300 MHz in CDCl<sub>3</sub>).

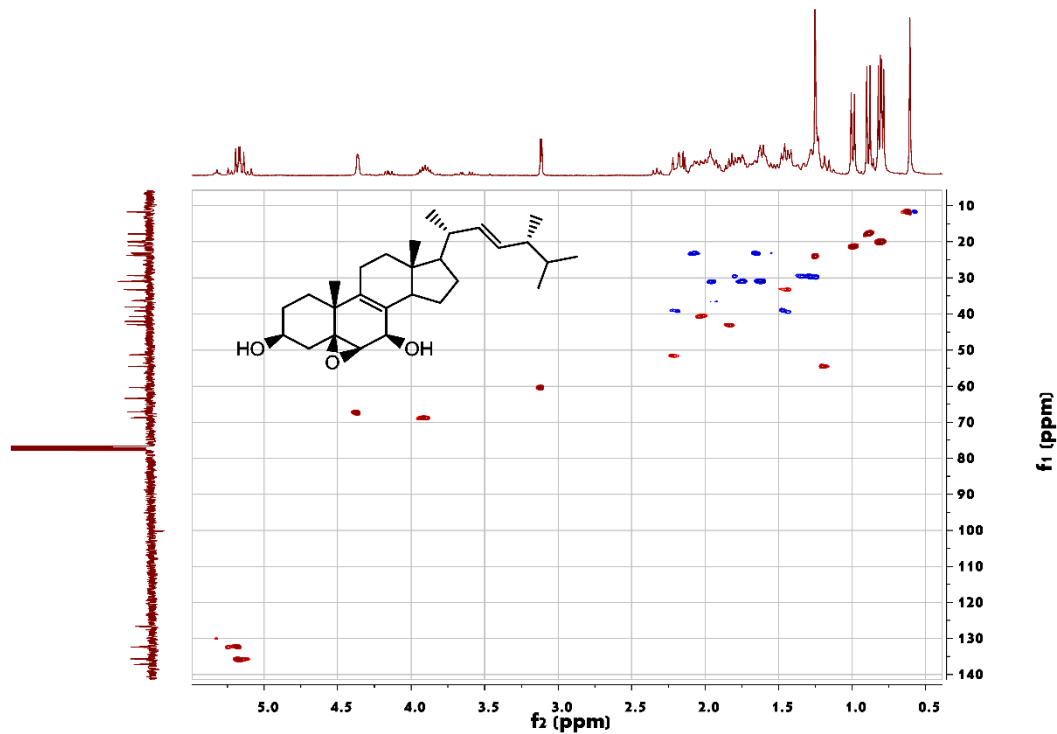

Figure S30. HMQC spectrum of compound 3 (300 MHz in CDCl<sub>3</sub>).

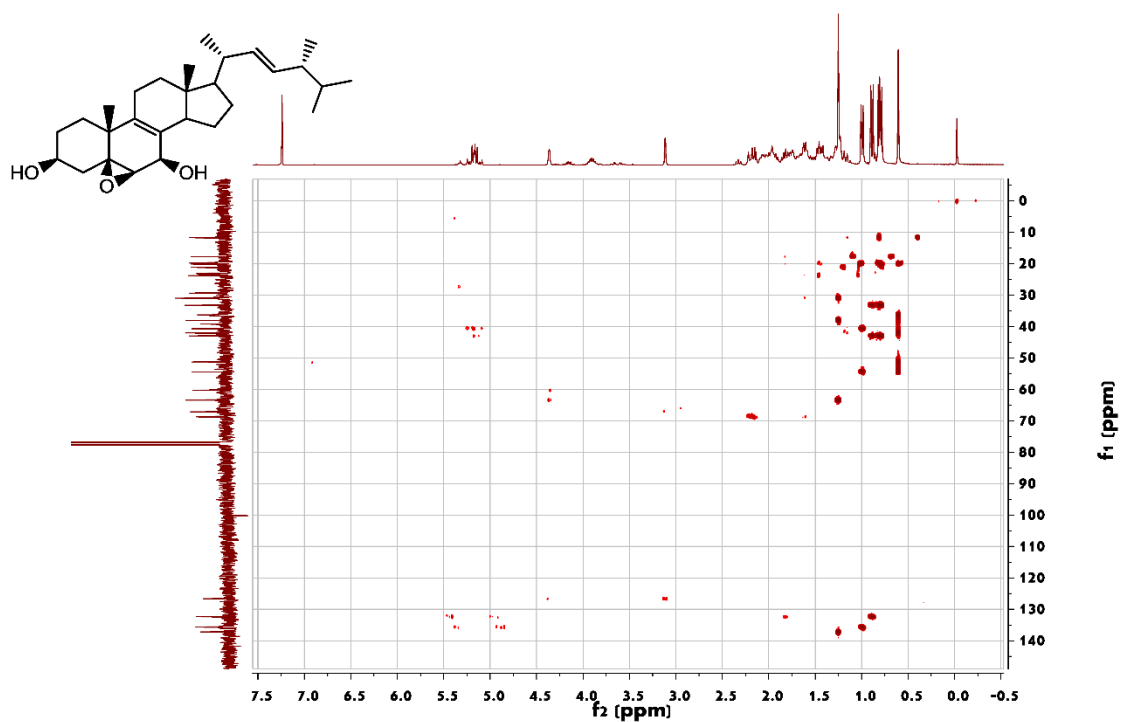

Figure S31. HMBC spectrum of compound 3 (300 MHz in CDCl<sub>3</sub>).

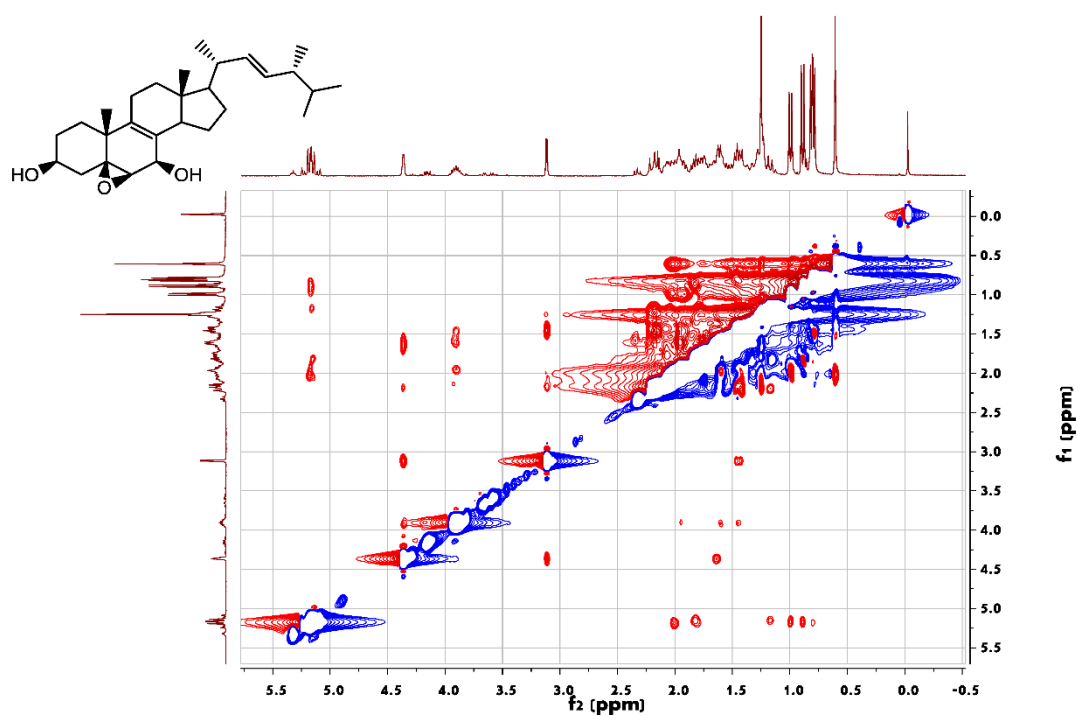

Figure S32. NOESY spectrum of compound 3 (300 MHz in CDCl<sub>3</sub>).



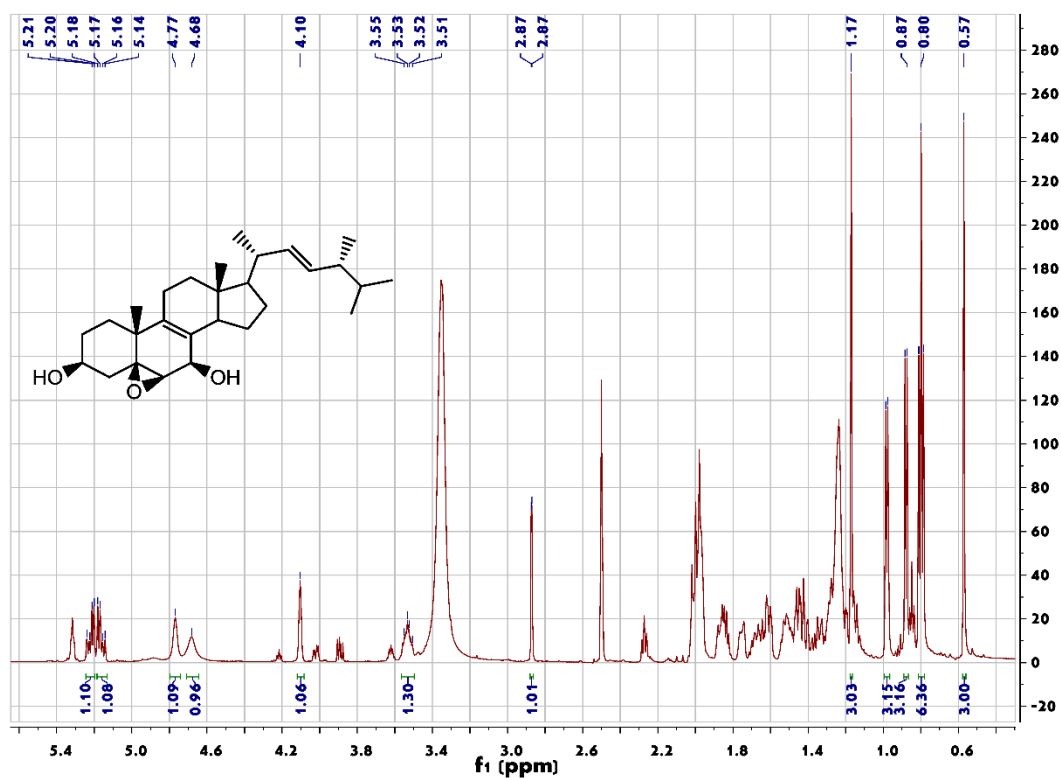Figure S33. <sup>1</sup>H-NMR spectrum of compound 3 (600 MHz in DMSO-*d*<sub>6</sub>).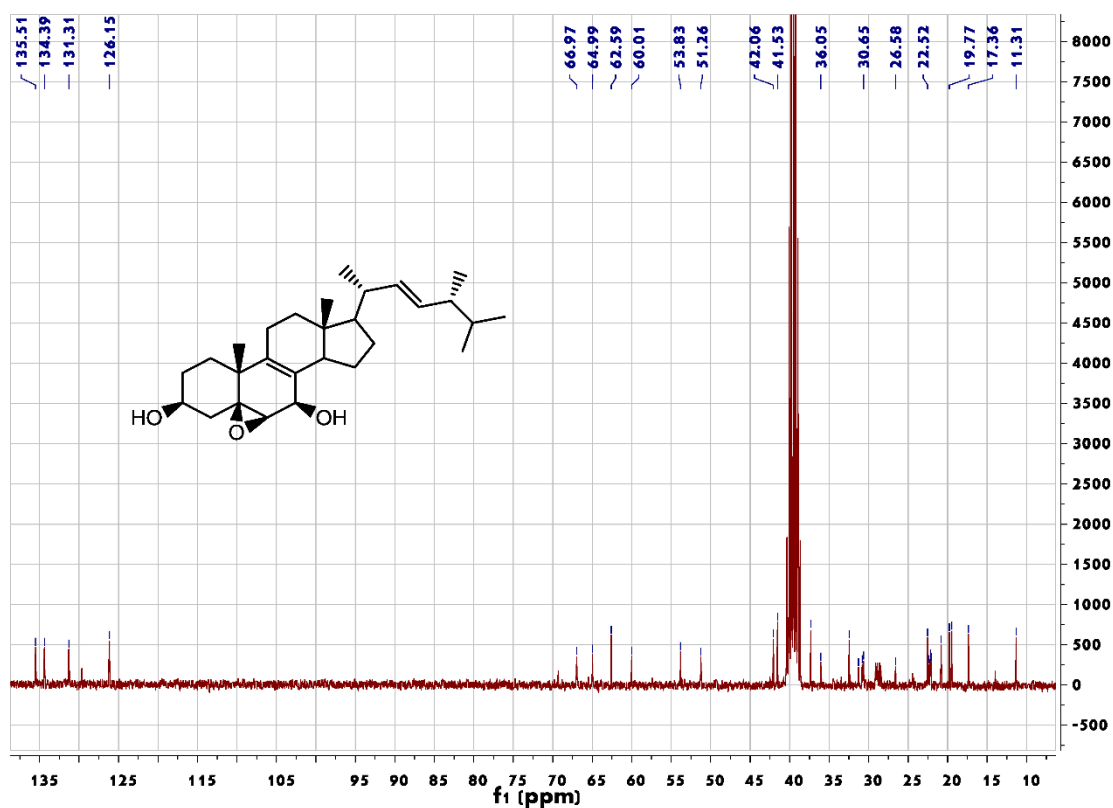Figure S34. <sup>13</sup>C-NMR spectrum of compound 3 (150 MHz in DMSO-*d*<sub>6</sub>).

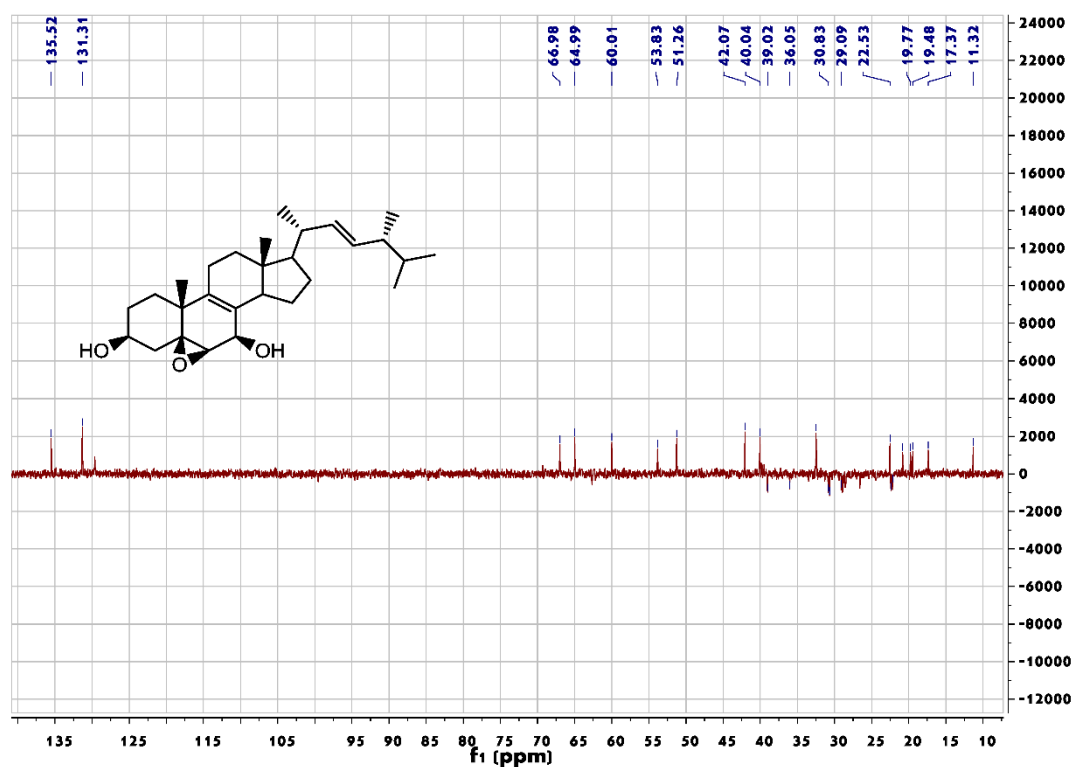

Figure S35. DEPT spectrum of compound 3 (150 MHz in DMSO-*d*<sub>6</sub>).

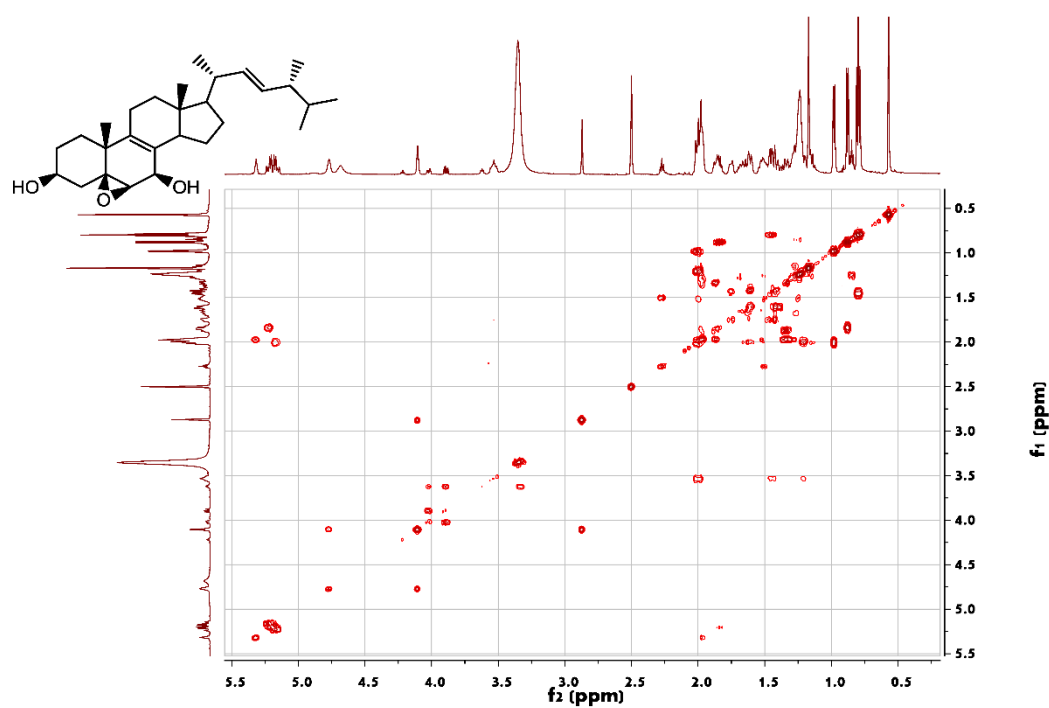

Figure S36. COSY spectrum of compound 3 (600 MHz in DMSO-*d*<sub>6</sub>).

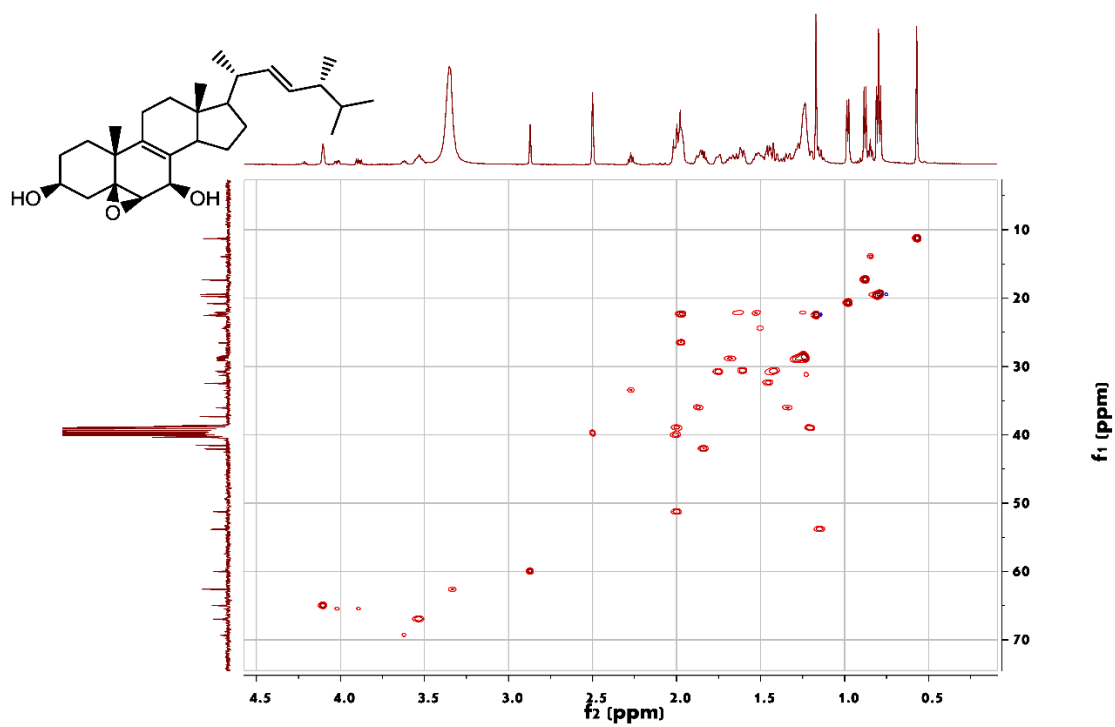Figure S37. HMQC spectrum of compound 3 (600 MHz in DMSO-*d*<sub>6</sub>).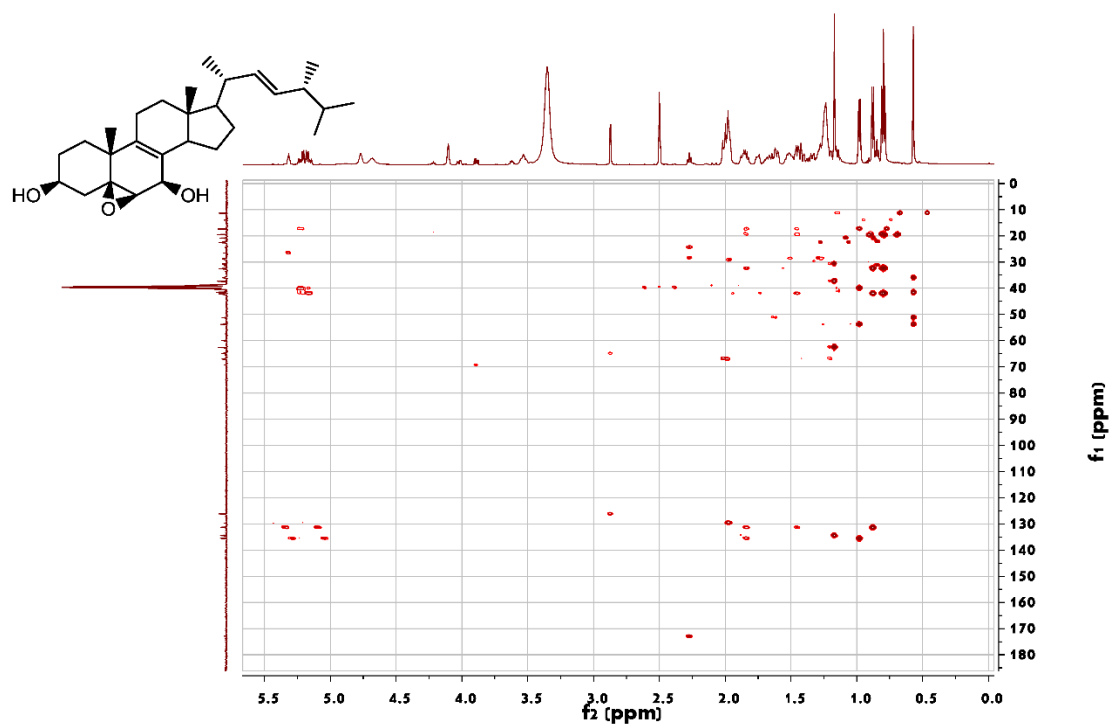Figure S38. HMBC spectrum of compound 3 (600 MHz in DMSO-*d*<sub>6</sub>).

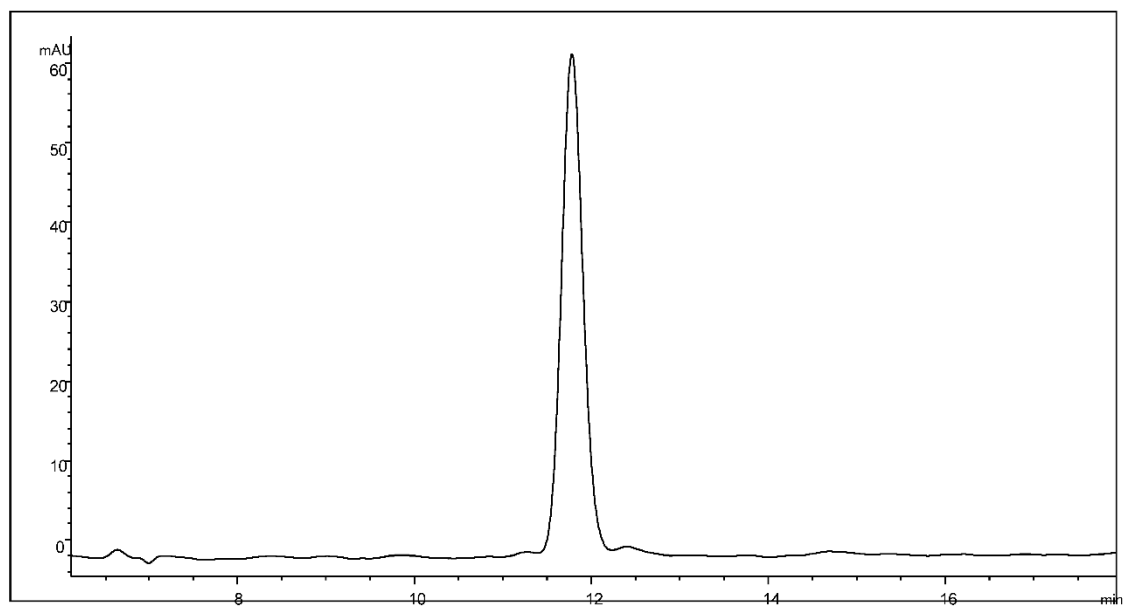

**Figure S39.** HPLC profile of compound **1** (80% MeOH at 210 nm).

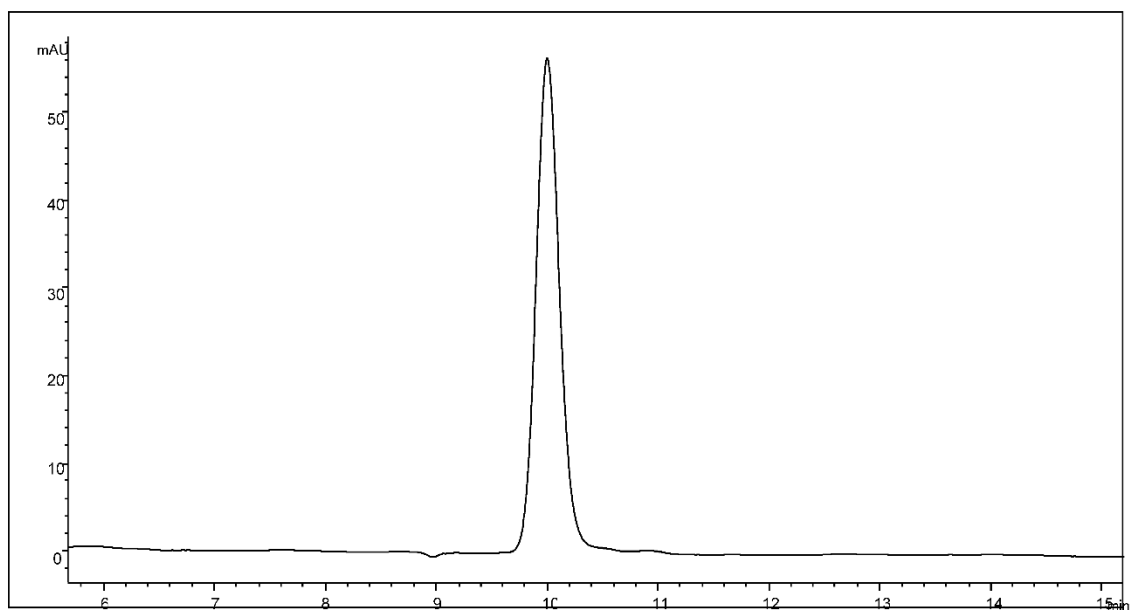

**Figure S40.** HPLC profile of compound **2** (75% MeOH at 210 nm).

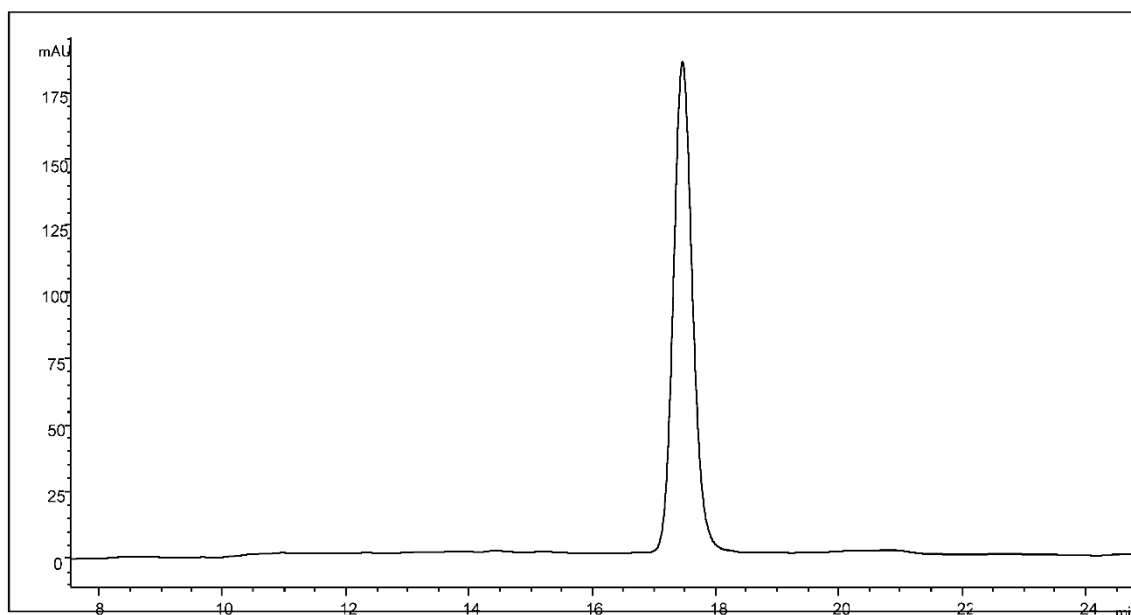

**Figure S41.** HPLC profile of compound **3** (90% MeOH at 210 nm).

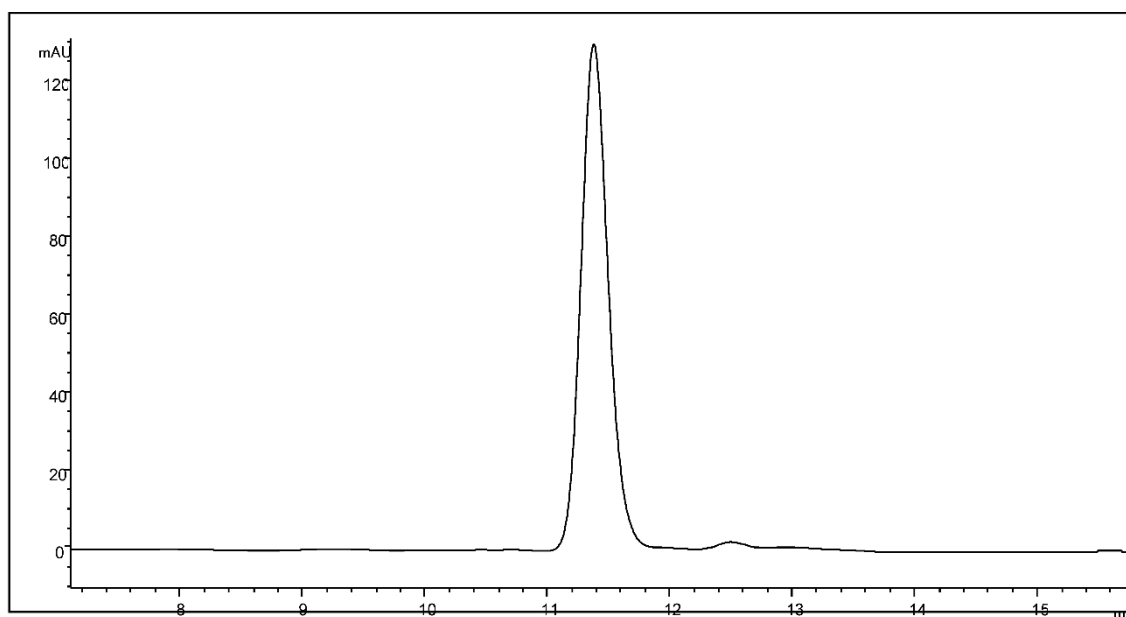

**Figure S42.** HPLC profile of compound **4** (80% MeOH at 210 nm).

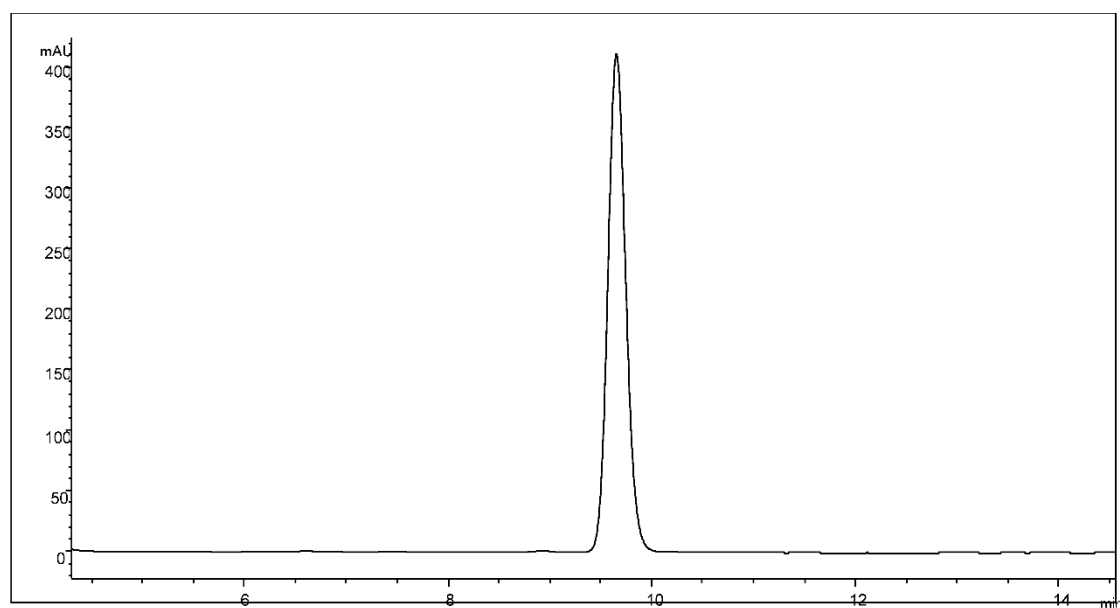

**Figure S43.** HPLC profile of compound **5** (95% MeOH at 210 nm).

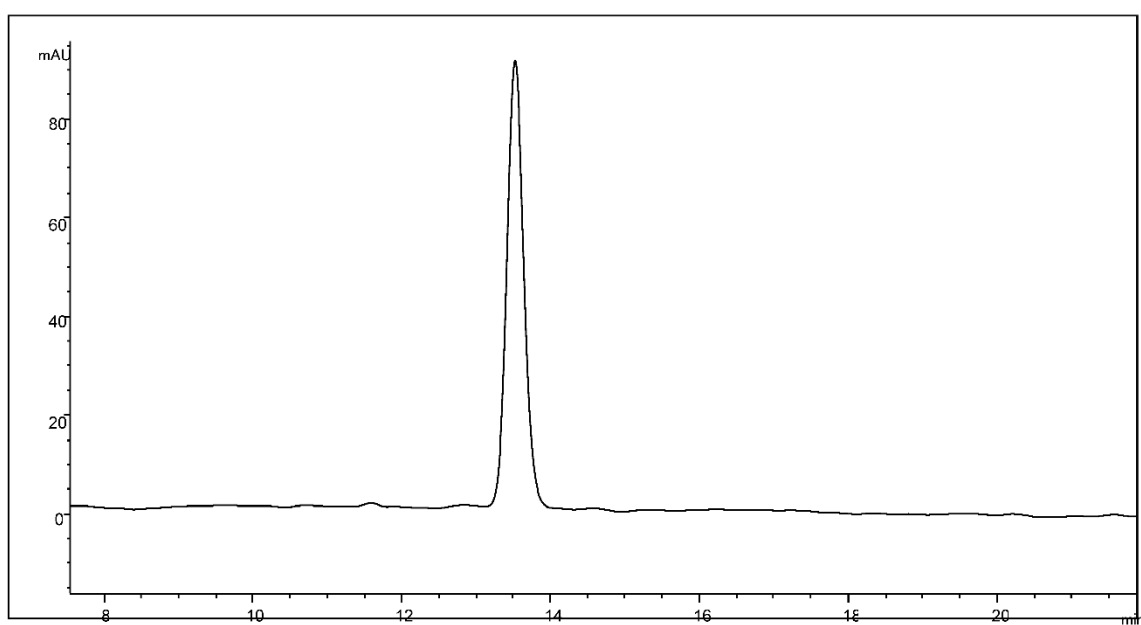

**Figure S44.** HPLC profile of compound **6** (95% MeOH at 210 nm).

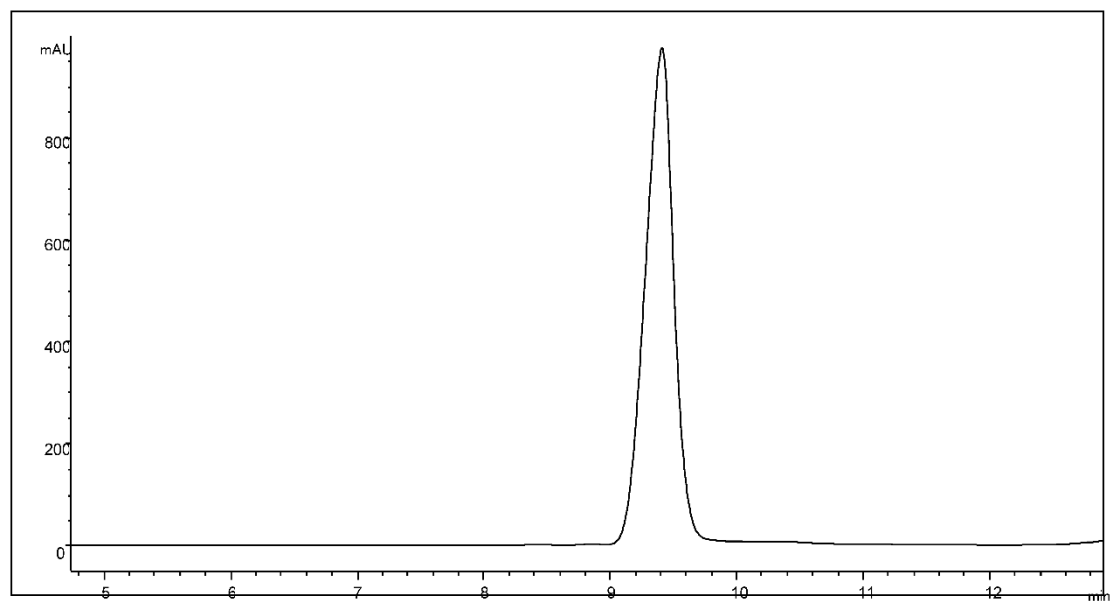

**Figure S45.** HPLC profile of compound **7** (90% MeOH at 210 nm).

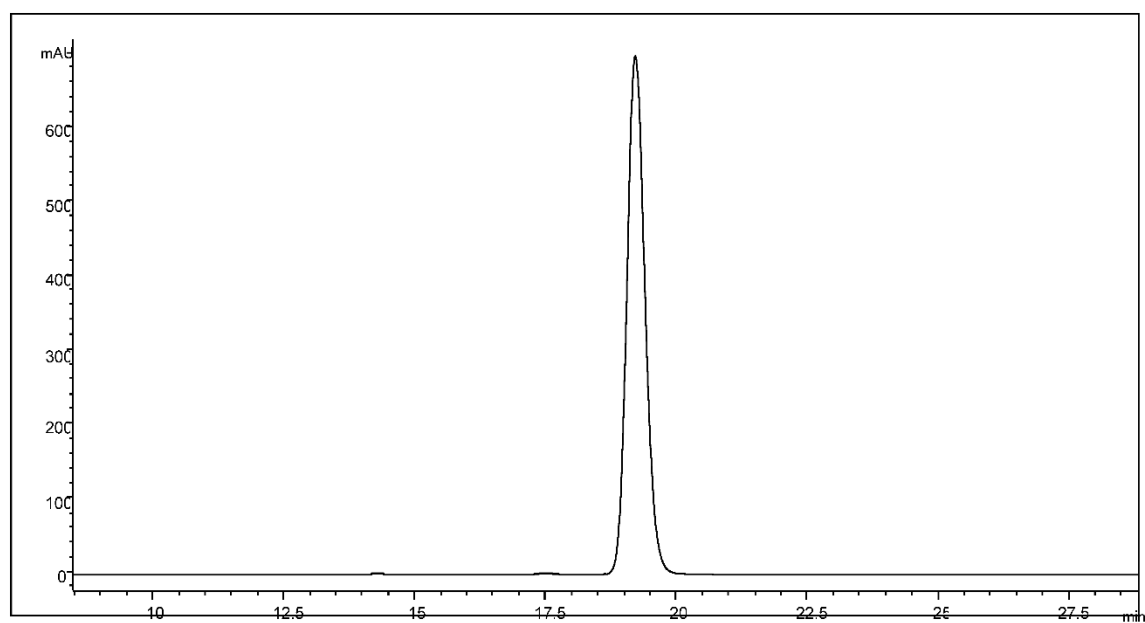

**Figure S46.** HPLC profile of compound **8** (80% MeOH at 210 nm).

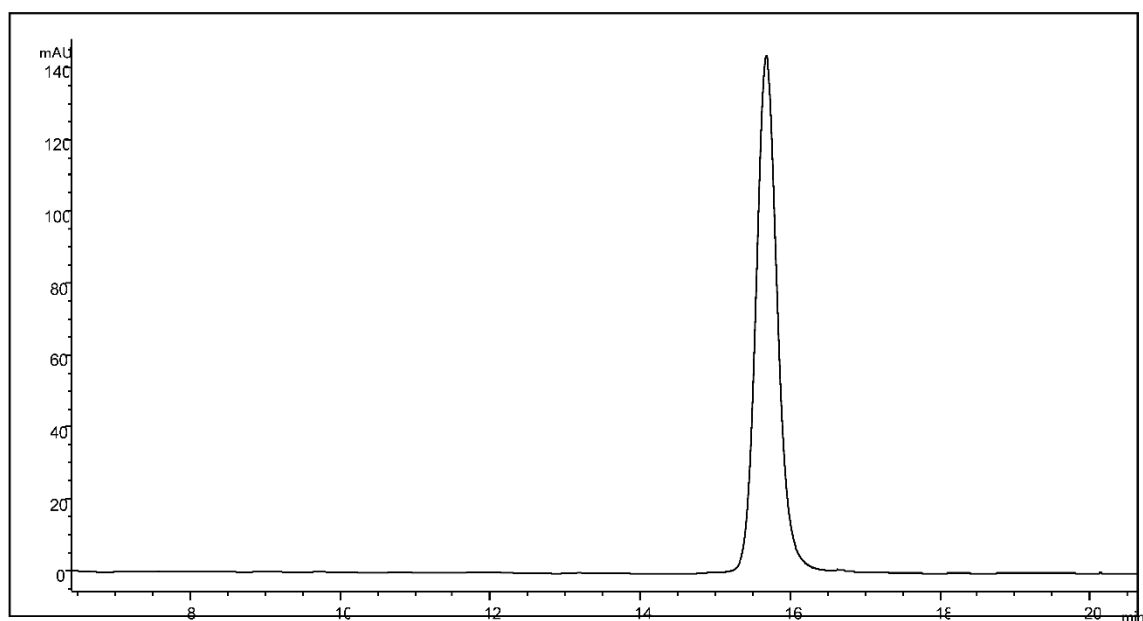

**Figure S47.** HPLC profile of compound **11** (90% MeOH at 210 nm).

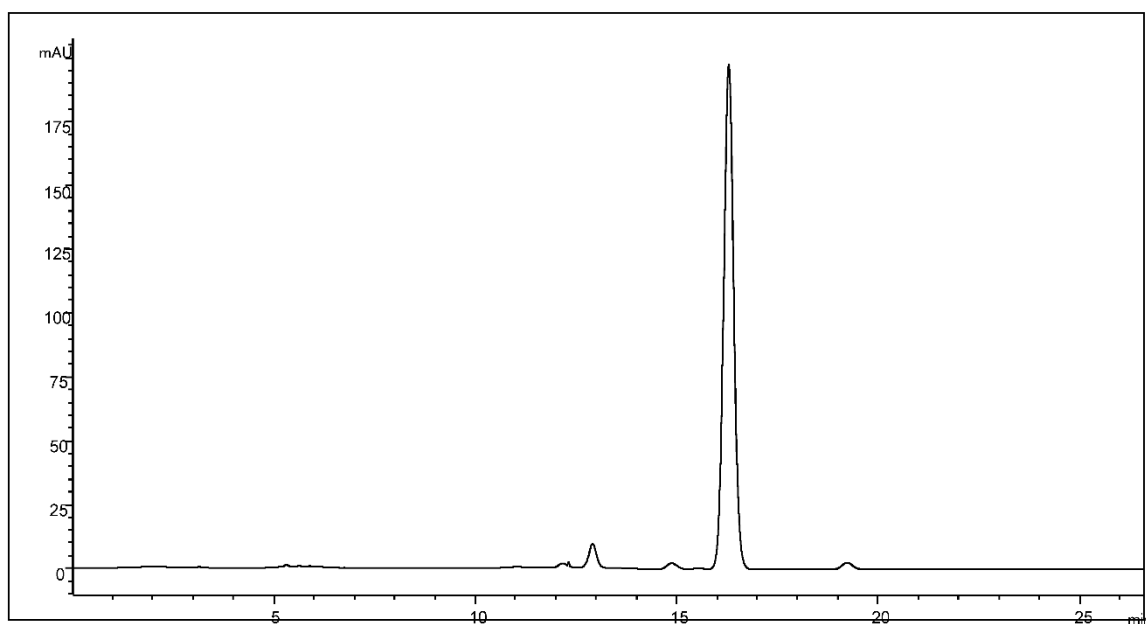

**Figure S48.** HPLC profile of compound **12** (100% MeOH at 280 nm).



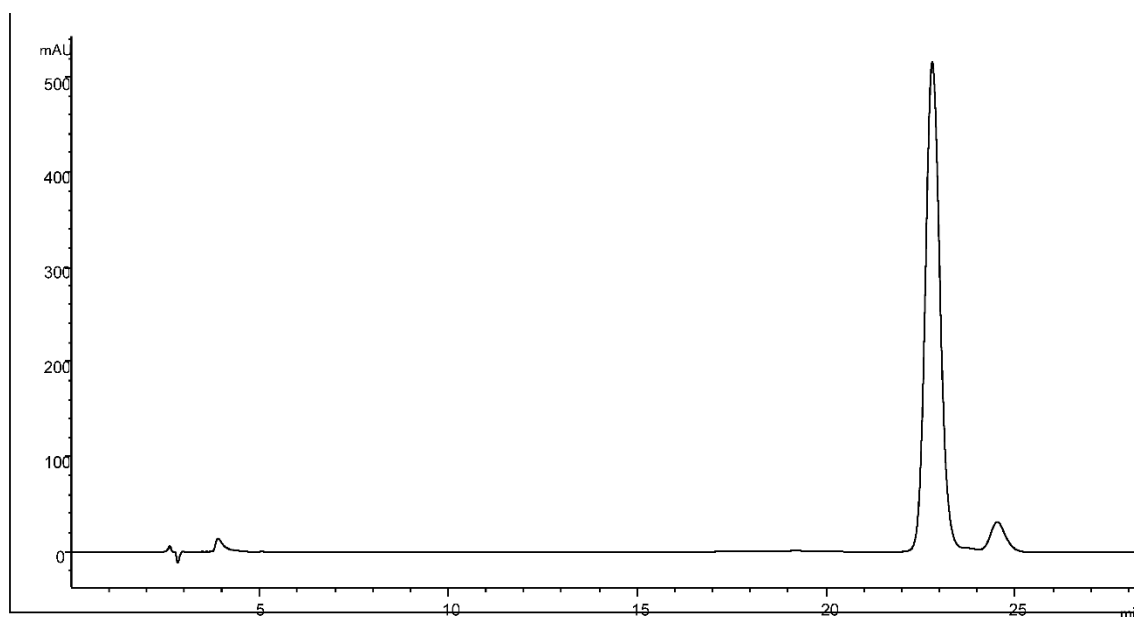

**Figure S49.** HPLC profile of compound **13** (90% MeOH at 210nm).

**Table S1.** Characteristics of compounds **1–8**, **11** and **12**.

| Compounds | Retention Time (min) | Purity  | Wavelength |
|-----------|----------------------|---------|------------|
| <b>1</b>  | 11.773               | 97.60%  | 210        |
| <b>2</b>  | 10.004               | 98.97%  | 210        |
| <b>3</b>  | 19.003               | 99.00%  | 210        |
| <b>4</b>  | 11.376               | 96.805% | 210        |
| <b>5</b>  | 9.657                | 99.09%  | 210        |
| <b>6</b>  | 13.524               | 99.12%  | 210        |
| <b>7</b>  | 9.406                | 93.57%  | 210        |
| <b>8</b>  | 19.227               | 98.87%  | 210        |
| <b>11</b> | 15.686               | 98.07%  | 210        |
| <b>12</b> | 15.803               | 97.893  | 280        |
| <b>13</b> | 22.797               | 93.774  | 210        |

**Table S2.**  $^{13}\text{C}$ -NMR data ( $\delta$ ) of 4–13 (75 MHz).

| No. | 4 <sup>a</sup> | 5 <sup>a</sup> | 6 <sup>a,*</sup> | 7 <sup>a</sup> | 8 <sup>b</sup> | 9 <sup>b</sup> | 10 <sup>a,*</sup> | 11 <sup>a,*</sup> | 12 <sup>b</sup> | 13 <sup>b</sup> |
|-----|----------------|----------------|------------------|----------------|----------------|----------------|-------------------|-------------------|-----------------|-----------------|
| 1   | 31.2           | 31.2           | 31.4             | 26.9           | 30.4           | 31.1           | 30.7              | 31.7              | 38.6            | 31.4            |
| 2   | 32.5           | 32.5           | 30.9             | 31.0           | 31.0           | 32.2           | 31.0              | 31                | 32.0            | 33.2            |
| 3   | 65.9           | 66.0           | 65.6             | 65.8           | 68.8           | 68.7           | 65.1              | 65.1              | 70.7            | 68.9            |
| 4   | 40.2           | 40.0           | 39.2             | 40.2           | 39.3           | 39.6           | 40.5              | 40.9              | 41.0            | 39.5            |
| 5   | 74.5           | 74.5           | 74.5             | 73.7           | 65.9           | 67.8           | 74.5              | 76.3              | 140.0           | 65.1            |
| 6   | 72.1           | 72.2           | 69.1             | 71.6           | 62.8           | 61.3           | 77.9              | 76.0              | 116.5           | 60.5            |
| 7   | 119.5          | 119.5          | 120.6            | 120.3          | 67.0           | 65.1           | 71.6              | 71.6              | 119.8           | 63.9            |
| 8   | 139.7          | 139.7          | 139.7            | 141.1          | 127.1          | 125.2          | 127.2             | 127.0             | 141.6           | 126.9           |
| 9   | 42.3           | 42.3           | 42.6             | 77.3           | 134.7          | 38.7           | 136.2             | 36.4              | 46.3            | 39.8            |
| 10  | 36.7           | 36.6           | 38.1             | 40.0           | 38.2           | 35.8           | 40.2              | 39.8              | 37.2            | 34.9            |
| 11  | 27.7           | 21.3           | 20.6             | 26.9           | 23.6           | 19.0           | 23.0              | 18.8              | 21.3            | 19.5            |
| 12  | 39.0           | 38.9           | 38.9             | 35.0           | 35.9           | 36.6           | 35.9              | 36.6              | 39.3            | 37.3            |
| 13  | 43.0           | 43.0           | 43.1             | 43.3           | 42.3           | 42.9           | 41.3              | 42.4              | 43.0            | 43.8            |
| 14  | 54.2           | 54.2           | 54.2             | 50.1           | 49.8           | 152.5          | 49.4              | 147.6             | 54.6            | 151.9           |
| 15  | 22.6           | 22.6           | 22.4             | 22.6           | 24.1           | 24.9           | 28.6              | 24.7              | 23.2            | 26.1            |
| 16  | 27.7           | 27.8           | 27.9             | 27.8           | 29.2           | 27.2           | 22.7              | 27.2              | 28.5            | 28.2            |
| 17  | 55.3           | 55.3           | 55.2             | 55.4           | 53.8           | 56.8           | 53.9              | 56.0              | 55.8            | 55.6            |
| 18  | 12.1           | 12.0           | 12.0             | 11.7           | 11.5           | 17.6           | 11.2              | 18.0              | 12.3            | 17.9            |
| 19  | 17.7           | 17.7           | 17.4             | 21.4           | 23.0           | 16.5           | 22.9              | 17.5              | 16.5            | 17.1            |
| 20  | 40.1           | 40.0           | 39.8             | 39.8           | 40.6           | 39.3           | 40.0              | 38.5              | 42.9            | 40.6            |
| 21  | 20.9           | 21             | 21               | 21.0           | 21.2           | 21.2           | 20.9              | 21.2              | 21.3            | 21.3            |
| 22  | 135.7          | 135.4          | 135.4            | 135.5          | 135.8          | 135.3          | 135.5             | 135.5             | 135.8           | 135.4           |
| 23  | 130.5          | 131.4          | 131.4            | 131.4          | 132.2          | 132.2          | 131.3             | 131.5             | 132.2           | 132.5           |
| 24  | 47.2           | 42.0           | 41.9             | 42.1           | 43.0           | 42.8           | 42.1              | 42.1              | 40.4            | 43.1            |
| 25  | 70.7           | 32.5           | 32.5             | 32.5           | 33.3           | 33.1           | 32.5              | 32.5              | 33.3            | 33.3            |
| 26  | 26.0           | 19.5           | 19.5             | 19.5           | 19.9           | 19.7           | 19.5              | 19.5              | 19.9            | 19.9            |
| 27  | 28.3           | 19.8           | 19.8             | 19.8           | 20.2           | 20.0           | 19.8              | 19.8              | 20.2            | 20.2            |
| 28  | 15.0           | 17.3           | 17.3             | 17.4           | 17.9           | 18.1           | 17.4              | 17.4              | 17.8            | 17.9            |

<sup>a</sup> Measured in DMSO-*d*<sub>6</sub>; <sup>b</sup> Measured in CDCl<sub>3</sub>; \* Measured in solvent different from literature.
